# Supplementary material for: Bioinformatic analysis of short-chain dehydrogenase/reductase proteins in plant peroxisomes
Source: Front Plant Sci. 2023 Jun 9;14:1180647. doi: 10.3389/fpls.2023.1180647 (PMC10288848; doi:10.3389/fpls.2023.1180647)
Supplement: Supplementary file 3 [file Table_1.xlsx]

## Sheet: Sheet1
Table S1. Primers used in this paper
primers for subcellular localization
SDRf_F	gtacaagagatctgcgtcgactATGAGCAATCATCAAACTTTGAC
SDRf_R	cgatcggggaaattcgagctcTCAGAGAGATGAAAAGATGGGCACAC
SDRg_F	gtacaagagatctgcgtcgactATGAGCAATCATCAAACTAAGCAGG
SDRg_R	cgatcggggaaattcgagctcTCAAAGAGAAGAAAAAATGGGCACACCG
SDRh_F	gtacaagagatctgcgtcgactATGAGCAATCATCAAACTGTATTGAAGC
SDRh_R	cgatcggggaaattcgagctcCTACGGAGAAAGAGAAGAAAAAATGGGC
SDRi_F	gtacaagagatctgcgtcgactATGTCGTTTTGGTTTAGAGACAAG
SDRi_R	cgatcggggaaattcgagctcTTAGAGAGATGAAAAAATGGGCAGACC
SDRj_F	gtacaagagatctgcgtcgactATGGACGTTGTCACGTTGA
SDRj_R	cgatcggggaaattcgagctcTCACAACTTGGAAATAAGTTTTTTAGACTC
SDRf-PTS1_R1	AGATGGGCACACCGGGCAATGTAGCTCCGGAATCgtcgacCTTGTACAGCTCGTC
SDRf-PTS1_R2	cgatcggggaaattcgagctcTCAGAGAGATGAAAAGATGGGCACACCGGGC
SDRh-PTS1_R1	AAGAAAAAATGGGCACACCGGGCAGTGTAGTTCCgtcgacCTTGTACAGCTCGTC
SDRh-PTS1_R2	cgatcggggaaattcgagctcCTACGGAGAAAGAGAAGAAAAAATGGGCAC
primers for CRISPR/Cas9 system
SDRj-gRT1	TGCCGCCGTTTCATTTAACGgttttagagctagaaat
SDRj-AtU3bT1	CGTTAAATGAAACGGCGGCATgaccaatgttgctcc
U-F	CTCCGTTTTACCTGTGGAATCG
gR-R	CGGAGGAAAATTCCATCCAC
Pps-GGL	TTCAGAggtctcTctcgACTAGTATGGAATCGGCAGCAAAGG
Pgs-GGR	AGCGTGggtctcGaccgACGCGTATCCATCCACTCCAAGCTC
primers for identification of mutant plants
SDRj-PCR-F	TCTTGGTTCGGTCGCAACTT
SDRj-PCR-R	TCGTTTGCCGACAGTAGGAG
