# Supplementary material for: Bioinformatic analysis of short-chain dehydrogenase/reductase proteins in plant peroxisomes
Source: Front Plant Sci. 2023 Jun 9;14:1180647. doi: 10.3389/fpls.2023.1180647 (PMC10288848; doi:10.3389/fpls.2023.1180647)
Supplement: Supplementary file 4 [file Table_2.xlsx]

## Sheet: Sheet1
Table S2.Co-expressed genes of SDRj
	Gene	Function	Entrez Gene ID	Other ID	whether peroxisomal gene
1	ANNAT4	annexin 4	818457	AT2G38750	no
2	ANNAT2	annexin 2	836626	AT5G65020	no
3	SWEET16	Nodulin MtN3 family protein	820921	AT3G16690	no
4	AT1G20490	AMP-dependent synthetase and ligase family protein	838637	AT1G20490	no
5	OCT6	organic cation/carnitine transporter 6	838207	AT1G16370	no
6	MC7	metacaspase 7	844269	AT1G79310	no
7	MSRB6	methionine sulfoxide reductase B6	825821	AT4G04840	no
8	VHA-E3	vacuolar H+-ATPase subunit E	842725	AT1G64200	no
9	ANNAT3	annexin 3	818458	AT2G38760	no
10	AT4G11210	Disease resistance-responsive (dirigent-like protein) family protein	826723	AT4G11210	no
11	AT5G23820	MD-2-related lipid recognition domain-containing protein	832447	AT5G23820	no
12	PEN1	pentacyclic triterpene synthase 1	827200	AT4G15340	no
13	AT3G10260	Reticulon family protein	820188	AT3G10260	no
14	AT5G19110	Eukaryotic aspartyl protease family protein	832031	AT5G19110	no
15	SQP2	squalene monooxygenase 2	832479	AT5G24140	no
16	CYP94B1	cytochrome P450: family 94: subfamily B: polypeptide 1	836464	AT5G63450	no
17	CYP705A1	cytochrome P450: family 705: subfamily A: polypeptide 1	827199	AT4G15330	no
18	AT4G18440	L-Aspartase-like family protein	827575	AT4G18440	no
19	FLA15	FASCICLIN-like arabinogalactan protein 15 precursor	824402	AT3G52370	no
20	AT4G16750	Integrase-type DNA-binding superfamily protein	827379	AT4G16750	no
21	CYP705A12	cytochrome P450: family 705: subfamily A: polypeptide 12	834265	AT5G42580	no
22	AT5G26260	TRAF-like family protein	832695	AT5G26260	no
23	PMSR2	peptidemethionine sulfoxide reductase 2	830637	AT5G07460	no
24	CYP84A4	Cytochrome P450 superfamily protein	830312	AT5G04330	no
25	AT5G04120	Phosphoglycerate mutase family protein	830290	AT5G04120	no
26	MAPKKK17	mitogen-activated protein kinase kinase kinase 17	817812	AT2G32510	no
27	AT1G72130	Major facilitator superfamily protein	843544	AT1G72130	no
28	CYP71A16	cytochrome P450: family 71: subfamily A: polypeptide 16	834266	AT5G42590	no
29	GSTU6	glutathione S-transferase tau 6	817493	AT2G29440	no
30	BGLU6	beta glucosidase 6	3767579	AT1G60270	no
31	ENODL19	early nodulin-like protein 19	826900	AT4G12880	no
32	MHX	magnesium/proton exchanger	819373	AT2G47600	no
33	AT1G31710	Copper amine oxidase family protein	840058	AT1G31710	no
34	AT3G09540	Pectin lyase-like superfamily protein	820111	AT3G09540	no
35	MRN1	marneral synthase	834267	AT5G42600	no
36	NIC3	nicotinamidase 3	832386	AT5G23220	no
37	AT3G62010	metal ion-binding protein	825374	AT3G62010	no
38	ATCSLA09	Nucleotide-diphospho-sugar transferases superfamily protein	831734	AT5G03760	no
39	GSTU5	glutathione S-transferase tau 5	817494	AT2G29450	no
40	AT1G14960	Polyketide cyclase/dehydrase and lipid transport superfamily protein	838061	AT1G14960	no
41	AT1G34510	Peroxidase superfamily protein	840353	AT1G34510	no
42	MES7	methyl esterase 7	816888	AT2G23560	no
43	AKN2	APS-kinase 2	830153	AT4G39940	no
44	AT5G23840	MD-2-related lipid recognition domain-containing protein	832449	AT5G23840	no
45	AT1G06640	2-oxoglutarate (2OG) and Fe(II)-dependent oxygenase superfamily protein	837173	AT1G06640	no
46	AT5G41120	Esterase/lipase/thioesterase family protein	834114	AT5G41120	no
47	RSH2	root hair specific 2	837853	AT1G12950	no
48	DET2	3-oxo-5-alpha-steroid 4-dehydrogenase family protein	818383	AT2G38050	no
49	AT4G29690	Alkaline-phosphatase-like family protein	829090	AT4G29690	no
50	TLL1	triacylglycerol lipase-like 1	841089	AT1G45201	no
51	PSK5	phytosulfokine 5 precursor	836716	AT5G65870	no
52	AT5G02350	Cysteine/Histidine-rich C1 domain family protein	831920	AT5G02350	no
53	SERAT1;1	serine acetyltransferase 1;1	835778	AT5G56760	no
54	GSTU26	glutathione S-transferase tau 26	838290	AT1G17190	no
55	AT5G44050	MATE efflux family protein	834428	AT5G44050	no
56	AT4G23590	Tyrosine transaminase family protein	828459	AT4G23590	no
57	AT4G37850	basic helix-loop-helix (bHLH) DNA-binding superfamily protein	829941	AT4G37850	no
58	GH9B8	glycosyl hydrolase 9B8	817861	AT2G32990	no
59	AT5G54585	hypothetical protein	835547	AT5G54585	no
60	AT3G55940	Phosphoinositide-specific phospholipase C family protein	824760	AT3G55940	no
61	AT1G22550	Major facilitator superfamily protein	838861	AT1G22550	no
62	ZW9	TRAF-like family protein	842196	AT1G58270	no
63	AT4G29700	Alkaline-phosphatase-like family protein	829091	AT4G29700	no
64	ST4B	sulfotransferase 4B	837902	AT1G13420	no
65	AT1G69526	S-adenosyl-L-methionine-dependent methyltransferases superfamily protein	843287	AT1G69526	no
66	SIP1	Raffinose synthase family protein	834037	AT5G40390	no
67	AT3G44870	S-adenosyl-L-methionine-dependent methyltransferases superfamily protein	823621	AT3G44870	no
68	AT5G02230	Haloacid dehalogenase-like hydrolase (HAD) superfamily protein	831784	AT5G02230	no
69	PLA-I{gamma}1	alpha/beta-Hydrolases superfamily protein	837191	AT1G06800	no
70	AT1G72500	inter alpha-trypsin inhibitor: heavy chain-like protein	843582	AT1G72500	no
71	AT5G22400	Rho GTPase activating protein with PAK-box/P21-Rho-binding domain-containing protein	832301	AT5G22400	no
72	RABC2b	RAB GTPase homolog C2B	820149	AT3G09910	no
73	PAP7	purple acid phosphatase 7	814719	AT2G01880	no
74	AT3G17120	transmembrane protein	820969	AT3G17120	no
75	XIB	myosin XI B	839246	AT1G04160	no
76	AT2G46930	Pectinacetylesterase family protein	819307	AT2G46930	no
77	AT1G62975	basic helix-loop-helix (bHLH) DNA-binding superfamily protein	842600	AT1G62975	no
78	AT2G44230	hypothetical protein (DUF946)	819031	AT2G44230	no
79	SAM-2	S-adenosylmethionine synthetase 2	826987	AT4G01850	no
80	AT2G16980	Major facilitator superfamily protein	816201	AT2G16980	no
81	AT4G08170	Inositol 1:3:4-trisphosphate 5/6-kinase family protein	826367	AT4G08170	no
82	AT5G23830	MD-2-related lipid recognition domain-containing protein	832448	AT5G23830	no
83	GGH1	gamma-glutamyl hydrolase 1	844202	AT1G78660	no
84	ZFP7	zinc finger protein 7	839077	AT1G24625	no
85	AXS2	UDP-D-apiose/UDP-D-xylose synthase 2	837341	AT1G08200	no
86	TBL28	TRICHOME BIREFRINGENCE-LIKE 28	818606	AT2G40150	no
87	CLH1	chlorophyllase 1	838554	AT1G19670	no
88	AT2G38500	2-oxoglutarate (2OG) and Fe(II)-dependent oxygenase superfamily protein	818432	AT2G38500	no
89	ACX1	acyl-CoA oxidase 1	827381	AT4G16760	peroxisomes
90	PP2-A14	phloem protein 2-A14	835288	AT5G52120	no
91	AT3G62000	S-adenosyl-L-methionine-dependent methyltransferases superfamily protein	825373	AT3G62000	no
92	AT3G16350	Homeodomain-like superfamily protein	820882	AT3G16350	no
93	DTX35	detoxifying efflux carrier 35	828669	AT4G25640	no
94	AT2G41312		5007951	AT2G41312	no
95	AT5G66420	TIM-barrel signal transduction protein	836774	AT5G66420	no
96	AT5G57340	ras guanine nucleotide exchange factor Q-like protein	835839	AT5G57340	no
97	AT5G47980	HXXXD-type acyl-transferase family protein	834849	AT5G47980	no
98	AT5G02170	Transmembrane amino acid transporter family protein	831896	AT5G02170	no
99	CYT1	Glucose-1-phosphate adenylyltransferase family protein	818562	AT2G39770	no
100	XIG	myosin-like protein XIG	816548	AT2G20290	no
101	AT2G25150	HXXXD-type acyl-transferase family protein	817053	AT2G25150	no
102	GSO1	Leucine-rich repeat transmembrane protein kinase	827760	AT4G20140	no
103	GGH2	gamma-glutamyl hydrolase 2	844204	AT1G78680	no
104	AT5G44720	Molybdenum cofactor sulfurase family protein	834501	AT5G44720	no
105	AT3G59340	solute carrier family 35 protein (DUF914)	825103	AT3G59340	no
106	AT5G24750	UDP-Glycosyltransferase superfamily protein	832544	AT5G24750	no
107	GL3	basic helix-loop-helix (bHLH) DNA-binding superfamily protein	834133	AT5G41315	no
108	GCL1	GCR2-like 1	836653	AT5G65280	no
109	SAL1	SAL1 phosphatase-like protein	836519	AT5G63980	no
110	TIFY10B	TIFY domain/Divergent CCT motif family protein	843834	AT1G74950	no
111	MLP423	MLP-like protein 423	839014	AT1G24020	no
112	CYP706A7	cytochrome P450: family 706: subfamily A: polypeptide 7	826842	AT4G12330	no
113	AT3G57400	transmembrane protein	824907	AT3G57400	no
114	APK	APS kinase	815963	AT2G14750	no
115	NAI1	basic helix-loop-helix (bHLH) DNA-binding superfamily protein	816807	AT2G22770	no
116	LOX6	PLAT/LH2 domain-containing lipoxygenase family protein	843077	AT1G67560	no
117	AT5G05600	2-oxoglutarate (2OG) and Fe(II)-dependent oxygenase superfamily protein	830443	AT5G05600	no
118	AT3G25700	Eukaryotic aspartyl protease family protein	822158	AT3G25700	no
119	ABCA4	ATP binding cassette subfamily A4	823929	AT3G47750	no
120	JAZ10	jasmonate-zim-domain protein 10	831162	AT5G13220	no
121	TBL41	TRICHOME BIREFRINGENCE-LIKE 41	820714	AT3G14850	no
122	NDL2	N-MYC downregulated-like 2	831051	AT5G11790	no
123	AT3G20390	endoribonuclease L-PSP family protein	821584	AT3G20390	no
124	AT2G22200	Integrase-type DNA-binding superfamily protein	816754	AT2G22200	no
125	SCPL9	serine carboxypeptidase-like 9	816832	AT2G23010	no
126	AT5G61350	Protein kinase superfamily protein	836256	AT5G61350	no
127	JAZ3	jasmonate-zim-domain protein 3	821055	AT3G17860	no
128	XTH31	xyloglucan endo-transglycosylase-related 8	823634	AT3G44990	no
129	AT2G30550	alpha/beta-Hydrolases superfamily protein	817604	AT2G30550	no
130	AT2G37580	RING/U-box superfamily protein	818334	AT2G37580	no
131	IAR3	peptidase M20/M25/M40 family protein	841602	AT1G51760	no
132	FLA16	FASCICLIN-like arabinogalactan protein 16 precursor	818159	AT2G35860	no
133	AT4G29270	HAD superfamily: subfamily IIIB acid phosphatase	829048	AT4G29270	no
134	RHS18	root hair specific 18	832302	AT5G22410	no
135	AT1G66190	hypothetical protein	842934	AT1G66190	no
136	AT2G41475	Embryo-specific protein 3: (ATS3)	6240499	AT2G41475	no
137	AT2G46535	hypothetical protein	819265	AT2G46535	no
138	OPR3	oxophytodienoate-reductase 3	815160	AT2G06050	peroxisomes
139	AT2G03980	GDSL-like Lipase/Acylhydrolase superfamily protein	814924	AT2G03980	no
140	AT5G19100	Eukaryotic aspartyl protease family protein	832030	AT5G19100	no
141	GSTU18	glutathione S-transferase TAU 18	837575	AT1G10360	no
142	EB1B	end binding protein 1B	836370	AT5G62500	no
143	AT2G47630	alpha/beta-Hydrolases superfamily protein	819376	AT2G47630	no
144	BGLU5	beta glucosidase 5	3767578	AT1G60260	no
145	AT1G72120	Major facilitator superfamily protein	843543	AT1G72120	no
146	AT5G47940	40S ribosomal protein S27	834845	AT5G47940	no
147	EXPA18	expansin A18	842601	AT1G62980	no
148	AT2G10931	hypothetical protein	6240675	AT2G10931	no
149	AT3G23090	TPX2 (targeting protein for Xklp2) protein family	821884	AT3G23090	no
150	AT4G23670	Polyketide cyclase/dehydrase and lipid transport superfamily protein	828467	AT4G23670	no
151	AT1G76640	Calcium-binding EF-hand family protein	843997	AT1G76640	no
152	NSH3	inosine-uridine preferring nucleoside hydrolase family protein	832004	AT5G18860	no
153	AT1G71695	Peroxidase superfamily protein	843498	AT1G71695	no
154	c-NAD-MDH2	Lactate/malate dehydrogenase family protein	834351	AT5G43330	no
155	AT1G11440	hypothetical protein	837686	AT1G11440	no
156	AT4G10390	Protein kinase superfamily protein	826631	AT4G10390	no
157	AT1G49520	SWIB complex BAF60b domain-containing protein	841376	AT1G49520	no
158	AT1G72510	DUF1677 family protein (DUF1677)	843583	AT1G72510	no
159	AT5G53050	alpha/beta-Hydrolases superfamily protein	835385	AT5G53050	no
160	MYB34	myb domain protein 34	836210	AT5G60890	no
161	EXP3	Barwin-like endoglucanases superfamily protein	818341	AT2G37640	no
162	BAT5	bile acid transporter 5	826811	AT4G12030	no
163	GATA2	GATA transcription factor 2	819112	AT2G45050	no
164	GolS1	galactinol synthase 1	819331	AT2G47180	no
165	ASP4	aspartate aminotransferase 4	842579	AT1G62800	no
166	SWEET17	Nodulin MtN3 family protein	827274	AT4G15920	no
167	AT2G02780	Leucine-rich repeat protein kinase family protein	814807	AT2G02780	no
168	AT3G02510	Regulator of chromosome condensation (RCC1) family protein	821100	AT3G02510	no
169	CYP709B3	cytochrome P450: family 709: subfamily B: polypeptide 3	828885	AT4G27710	no
170	GGP1	Class I glutamine amidotransferase-like superfamily protein	829176	AT4G30530	no
171	AT1G73210	hypothetical protein (DUF789)	843655	AT1G73210	no
172	AT1G59970	Matrixin family protein	842291	AT1G59970	no
173	AT5G61290	Flavin-binding monooxygenase family protein	836250	AT5G61290	no
174	AT5G39790	PROTEIN TARGETING TO STARCH (PTST)	833975	AT5G39790	no
175	TBL6	TRICHOME BIREFRINGENCE-LIKE 6	825412	AT3G62390	no
176	AT5G16010	3-oxo-5-alpha-steroid 4-dehydrogenase family protein	831458	AT5G16010	no
177	ACH	Acyl-CoA thioesterase family protein	827955	AT4G00520	peroxisomes
178	AT1G72140	Major facilitator superfamily protein	843545	AT1G72140	no
179	IQD23	IQ-domain 23	836327	AT5G62070	no
180	MK	mevalonate kinase	832804	AT5G27450	no
181	AT1G07985	Expressed protein	2745747	AT1G07985	no
182	ARR3	response regulator 3	842288	AT1G59940	no
183	AT1G27030	hypothetical protein	839592	AT1G27030	no
184	BAG1	BCL-2-associated athanogene 1	835281	AT5G52060	no
185	AT5G67390	glycosyltransferase-like protein	836875	AT5G67390	no
186	TAT3	tyrosine aminotransferase 3	817022	AT2G24850	no
187	PI-4KBETA2	phosphatidylinositol 4-OH kinase beta2	830794	AT5G09350	no
188	LAC1	laccase 1	838393	AT1G18140	no
189	GGPS6	geranylgeranyl pyrophosphate synthase 6	841377	AT1G49530	no
190	GATA4	GATA transcription factor 4	825224	AT3G60530	no
191	SAHH2	S-adenosyl-l-homocysteine (SAH) hydrolase 2	821964	AT3G23810	no
192	AT3G18950	Transducin/WD40 repeat-like superfamily protein	821427	AT3G18950	no
193	APS1	ATP sulfurylase 1	821861	AT3G22890	no
194	MYB55	myb domain protein 55	826853	AT4G01680	no
195	AT3G53370	S1FA-like DNA-binding protein	824505	AT3G53370	no
196	MTHFR2	methylenetetrahydrofolate reductase 2	819022	AT2G44160	no
197	XTH32	xyloglucan endotransglucosylase/hydrolase 32	818259	AT2G36870	no
198	AT3G21950	S-adenosyl-L-methionine-dependent methyltransferases superfamily protein	821753	AT3G21950	no
199	NEK2	NIMA-related kinase 2	819641	AT3G04810	no
200	COW1	Sec14p-like phosphatidylinositol transfer family protein	829610	AT4G34580	no
201	CB5-C	cytochrome B5	819277	AT2G46650	no
202	KAT5	peroxisomal 3-keto-acyl-CoA thiolase 2	834946	AT5G48880	peroxisomes
203	AT5G63490	CBS / octicosapeptide/Phox/Bemp1 (PB1) domains-containing protein	836468	AT5G63490	no
204	AT2G34310	hypothetical protein	817992	AT2G34310	no
205	AT4G32000	Protein kinase superfamily protein	829331	AT4G32000	no
206	AT1G62660	Glycosyl hydrolases family 32 protein	842563	AT1G62660	no
207	NUDX1	nudix hydrolase 1	843207	AT1G68760	no
208	AT5G35940	Mannose-binding lectin superfamily protein	833584	AT5G35940	no
209	AT1G44790	ChaC-like family protein	841043	AT1G44790	no
210	FBH3	basic helix-loop-helix (bHLH) DNA-binding superfamily protein	841537	AT1G51140	no
211	AT3G26450	Polyketide cyclase/dehydrase and lipid transport superfamily protein	822250	AT3G26450	no
212	PRR2	pinoresinol reductase 2	827000	AT4G13660	no
213	NET4B	Kinase interacting (KIP1-like) family protein	817600	AT2G30500	no
214	AT4G17470	alpha/beta-Hydrolases superfamily protein	827458	AT4G17470	no
215	AT4G22610	Bifunctional inhibitor/lipid-transfer protein/seed storage 2S albumin superfamily protein	828357	AT4G22610	no
216	IMD1	isopropylmalate dehydrogenase 1	831270	AT5G14200	no
217	AOS	allene oxide synthase	834273	AT5G42650	no
218	AT5G49800	Polyketide cyclase/dehydrase and lipid transport superfamily protein	835043	AT5G49800	no
219	AT5G44530	Subtilase family protein	834480	AT5G44530	no
220	MIR163		3767649	AT1G66725	no
221	AT2G27480	Calcium-binding EF-hand family protein	817293	AT2G27480	no
222	AT1G28100	hypothetical protein	839703	AT1G28100	no
223	MYB36	myb domain protein 36	835866	AT5G57620	no
224	AT1G14240	GDA1/CD39 nucleoside phosphatase family protein	837985	AT1G14240	no
225	PAO2	polyamine oxidase 2	818904	AT2G43020	peroxisomes
226	AT5G41460	transferring glycosyl group transferase (DUF604)	834147	AT5G41460	no
227	ZIP7	zinc transporter 7 precursor	814931	AT2G04032	no
228	AT2G42760	DUF1685 family protein	818876	AT2G42760	no
229	ATBETAFRUCT4	Glycosyl hydrolases family 32 protein	837777	AT1G12240	no
230	AT1G45015	MD-2-related lipid recognition domain-containing protein	841067	AT1G45015	no
231	THAS1	thalianol synthase 1	834852	AT5G48010	no
232	AT1G48440	B-cell receptor-associated 31-like protein	841265	AT1G48440	no
233	AT3G32030	Terpenoid cyclases/Protein prenyltransferases superfamily protein	822955	AT3G32030	no
234	AT5G56980	cotton fiber protein	835800	AT5G56980	no
235	CLC-B	chloride channel B	822336	AT3G27170	no
236	3BETAHSD/D2	3beta-hydroxysteroid-dehydrogenase/decarboxylase	817166	AT2G26260	no
237	WRKY69	WRKY DNA-binding protein 69	825040	AT3G58710	no
238	AT1G61240	lysine ketoglutarate reductase trans-splicing-like protein (DUF707)	842417	AT1G61240	no
239	AT3G05920	Heavy metal transport/detoxification superfamily protein	819761	AT3G05920	no
240	TBL24	TRICHOME BIREFRINGENCE-LIKE 24	828479	AT4G23790	no
241	AT2G15760	calmodulin-binding protein (DUF1645)	816070	AT2G15760	no
242	AT5G47950	HXXXD-type acyl-transferase family protein	834846	AT5G47950	no
243	AT1G14120	2-oxoglutarate (2OG) and Fe(II)-dependent oxygenase superfamily protein	837971	AT1G14120	no
244	SDRc	NAD(P)-binding Rossmann-fold superfamily protein	821069	AT3G01980	peroxisomes
245	RAP2.6	related to AP2 6	840915	AT1G43160	no
246	AT3G45700	Major facilitator superfamily protein	823712	AT3G45700	no
247	PIP2A	plasma membrane intrinsic protein 2A	824510	AT3G53420	no
248	AT3G21710	transmembrane protein	821725	AT3G21710	no
249	SOT18	desulfo-glucosinolate sulfotransferase 18	843749	AT1G74090	no
250	RGL3	RGA-like protein 3	831615	AT5G17490	no
251	AT3G11210	SGNH hydrolase-type esterase superfamily protein	820291	AT3G11210	no
252	CYP705A13	cytochrome P450: family 705: subfamily A: polypeptide 13	815896	AT2G14100	no
253	CYP86A2	cytochrome P450: family 86: subfamily A: polypeptide 2	828019	AT4G00360	no
254	EXPA7	expansin A7	837813	AT1G12560	no
255	CCP1	P-loop containing nucleoside triphosphate hydrolases superfamily protein	818020	AT2G34560	no
256	MS2	methionine synthase 2	821147	AT3G03780	no
257	CYP81F3	cytochrome P450: family 81: subfamily F: polypeptide 3	829894	AT4G37400	no
258	AT1G23850	transmembrane protein	838996	AT1G23850	no
259	AT3G61280	O-glucosyltransferase rumi-like protein (DUF821)	825300	AT3G61280	no
260	IGMT5	O-methyltransferase family protein	844013	AT1G76790	no
261	ACA2	alpha carbonic anhydrase 2	817367	AT2G28210	no
262	AT2G19780	Leucine-rich repeat (LRR) family protein	816497	AT2G19780	no
263	FLS3	flavonol synthase 3	836478	AT5G63590	no
264	MSS1	Major facilitator superfamily protein	832703	AT5G26340	no
265	RAP2.7	related to AP2.7	817403	AT2G28550	no
266	AT5G24760	GroES-like zinc-binding dehydrogenase family protein	832545	AT5G24760	no
267	GGT4	gamma-glutamyl transpeptidase 4	829042	AT4G29210	no
268	FT1	fucosyltransferase 1	814851	AT2G03220	no
269	AT5G40630	Ubiquitin-like superfamily protein	834062	AT5G40630	no
270	scpl4	serine carboxypeptidase-like 4	843665	AT1G73310	no
271	AT3G04140	Ankyrin repeat family protein	819569	AT3G04140	no
272	AT5G05840	replication factor C subunit: putative (DUF620)	830469	AT5G05840	no
273	AT4G36500	hypothetical protein	829802	AT4G36500	no
274	AT4G14905	Galactose oxidase/kelch repeat superfamily protein	827148	AT4G14905	no
275	AT1G35560	TCP family transcription factor	840452	AT1G35560	no
276	AT4G13100	RING/U-box superfamily protein	826924	AT4G13100	no
277	CYP705A8	cytochrome P450: family 705: subfamily A: polypeptide 8	817242	AT2G27000	no
278	MEB1	vacuolar iron transporter (VIT) family protein	828899	AT4G27860	no
279	ADK2	adenosine kinase 2	831882	AT5G03300	no
280	JAZ12	jasmonate-zim-domain protein 12	832214	AT5G20900	no
281	ZIP3	zinc transporter 3 precursor	817787	AT2G32270	no
282	CIPK5	CBL-interacting protein kinase 5	830960	AT5G10930	no
283	4CL8	AMP-dependent synthetase and ligase family protein	833792	AT5G38120	no
284	AT3G18170	Glycosyltransferase family 61 protein	821344	AT3G18170	no
285	AT2G20650	RING/U-box superfamily protein	816593	AT2G20650	no
286	AT2G15300	Leucine-rich repeat protein kinase family protein	816019	AT2G15300	no
287	AT3G61820	Eukaryotic aspartyl protease family protein	825355	AT3G61820	no
288	AT2G41870	Remorin family protein	818787	AT2G41870	no
289	AT3G51090	coiled-coil 90B-like protein (DUF1640)	824273	AT3G51090	no
290	AT5G44020	HAD superfamily: subfamily IIIB acid phosphatase	834425	AT5G44020	no
291	CYP705A5	cytochrome P450: family 705: subfamily A: polypeptide 5	834850	AT5G47990	no
292	UGT74B1	UDP-glucosyl transferase 74B1	839022	AT1G24100	no
293	NF-YA2	nuclear factor Y: subunit A2	819738	AT3G05690	no
294	RD26	NAC (No Apical Meristem) domain transcriptional regulator superfamily protein	828849	AT4G27410	no
295	AT3G62860	alpha/beta-Hydrolases superfamily protein	825461	AT3G62860	no
296	CSLA14	cellulose synthase like A14	824766	AT3G56000	no
297	AT5G54040	Cysteine/Histidine-rich C1 domain family protein	835487	AT5G54040	no
298	CYP82F1	cytochrome P450: family 82: subfamily F: polypeptide 1	817054	AT2G25160	no
299	AT1G50590	RmlC-like cupins superfamily protein	841481	AT1G50590	no
300	AT1G73480	alpha/beta-Hydrolases superfamily protein	843683	AT1G73480	no
301	AT1G17970	RING/U-box superfamily protein	838377	AT1G17970	no
302	AT1G18360	alpha/beta-Hydrolases superfamily protein	838417	AT1G18360	no
303	DEAR3	DREB and EAR motif protein 3	816866	AT2G23340	no
304	TAAC	thylakoid ATP/ADP carrier	831861	AT5G01500	no
305	AT2G16750	kinase with adenine nucleotide alpha hydrolases-like domain-containing protein	816176	AT2G16750	no
306	OPCL1	OPC-8:0 CoA ligase1	838639	AT1G20510	peroxisomes
307	AT1G11670	MATE efflux family protein	837711	AT1G11670	no
308	JAL34	Mannose-binding lectin superfamily protein	820894	AT3G16460	no
309	AT4G35030	Protein kinase superfamily protein	829655	AT4G35030	no
310	KUP6	K+ uptake permease 6	843366	AT1G70300	no
311	BEL10	BEL1-like homeodomain 10	838558	AT1G19700	no
312	AT5G55640	Na-translocating NADH-quinone reductase subunit A	835658	AT5G55640	no
313	AT4G23510	Disease resistance protein (TIR-NBS-LRR class) family	828451	AT4G23510	no
314	PKS1	phytochrome kinase substrate 1	814823	AT2G02950	no
315	AT4G34920	PLC-like phosphodiesterases superfamily protein	829644	AT4G34920	no
316	AT2G05632	hypothetical protein	6240607	AT2G05632	no
317	AT5G08050	wiskott-aldrich syndrome family protein: putative (DUF1118)	830699	AT5G08050	no
318	CYP705A27	cytochrome P450: family 705: subfamily A: polypeptide 27	841474	AT1G50520	no
319	AT5G47440	auxin canalization protein (DUF828)	834792	AT5G47440	no
320	PYL7	PYR1-like 7	827923	AT4G01026	no
321	RHS19	root hair specific 19	836876	AT5G67400	no
322	AT4G09560	Protease-associated (PA) RING/U-box zinc finger family protein	826540	AT4G09560	no
323	PIA1	PP2C induced by AVRRPM1	816590	AT2G20630	no
324	AT1G06620	2-oxoglutarate (2OG) and Fe(II)-dependent oxygenase superfamily protein	837171	AT1G06620	no
325	CYP708A2	cytochrome P450: family 708: subfamily A: polypeptide 2	834851	AT5G48000	no
326	AT1G61890	MATE efflux family protein	842485	AT1G61890	no
327	CYP79B3	cytochrome P450: family 79: subfamily B: polypeptide 3	816765	AT2G22330	no
328	AT5G43400	plant/protein	834358	AT5G43400	no
329	TRM11	hypothetical protein	828401	AT4G23020	no
330	AT5G01850	Protein kinase superfamily protein	831760	AT5G01850	no
331	AT1G75230	DNA glycosylase superfamily protein	843860	AT1G75230	no
332	AT5G00590		28720272	AT5G00590	no
333	AT1G49500	transcription initiation factor TFIID subunit 1b-like protein	841374	AT1G49500	no
334	CLE16	CLAVATA3/ESR-RELATED 16	28717514	AT2G01505	no
335	AT4G25660	PPPDE putative thiol peptidase family protein	828671	AT4G25660	no
336	ADT1	arogenate dehydratase 1	837725	AT1G11790	no
337	AT1G52910	fiber (DUF1218)	841724	AT1G52910	no
338	GlcNAc1pUT1	N-acetylglucosamine-1-phosphate uridylyltransferase 1	839993	AT1G31070	no
339	GRX480	Thioredoxin superfamily protein	839748	AT1G28480	no
340	AT4G24350	Phosphorylase superfamily protein	828538	AT4G24350	no
341	AT2G38000	chaperone protein dnaJ-like protein	818378	AT2G38000	no
342	MYB86	myb domain protein 86	832723	AT5G26660	no
343	AT4G03340	Core-2/I-branching beta-1:6-N-acetylglucosaminyltransferase family protein	827969	AT4G03340	no
344	KCS16	3-ketoacyl-CoA synthase 16	829574	AT4G34250	no
345	PIP2;5	plasma membrane intrinsic protein 2;5	824647	AT3G54820	no
346	CYP718	cytochrome P450: family 718	818885	AT2G42850	no
347	FLA6	FASCICLIN-like arabinogalactan 6	816574	AT2G20520	no
348	AT5G26270	transmembrane protein	832696	AT5G26270	no
349	AT3G15720	Pectin lyase-like superfamily protein	820815	AT3G15720	no
350	AT4G13495		5008139	AT4G13495	no
351	ELF4-L2	ELF4-like 2	843595	AT1G72630	no
352	AT3G05936	hypothetical protein	6240608	AT3G05936	no
353	UPS1	ureide permease 1	814888	AT2G03590	no
354	AT5G43745	ion channel POLLUX-like protein: putative (DUF1012)	834395	AT5G43745	no
355	AT2G39420	alpha/beta-Hydrolases superfamily protein	818527	AT2G39420	no
356	AT1G24320	Six-hairpin glycosidases superfamily protein	839048	AT1G24320	no
357	AT2G39690	ternary complex factor MIP1 leucine-zipper protein (Protein of unknown function: DUF547)	818552	AT2G39690	no
358	OPT7	oligopeptide transporter 7	826672	AT4G10770	no
359	PRN	pirin	825091	AT3G59220	no
360	AK3	aspartate kinase 3	821287	AT3G02020	no
361	CINV2	cytosolic invertase 2	826535	AT4G09510	no
362	AT3G50845	MIP18 family protein (DUF59)	5008077	AT3G50845	no
363	RBOHB	respiratory burst oxidase-like protein	837430	AT1G09090	no
364	AT5G54300	cotton fiber-like protein (DUF761)	835518	AT5G54300	no
365	GLIP5	GDSL-motif lipase 5	841830	AT1G53920	no
366	IPP2	isopentenyl pyrophosphate:dimethylallyl pyrophosphate isomerase 2	820960	AT3G02780	peroxisomes
367	OFP17	ovate family protein 17	817590	AT2G30395	no
368	NRS/ER	nucleotide-rhamnose synthase/epimerase-reductase	842603	AT1G63000	no
369	AT2G05260	alpha/beta-Hydrolases superfamily protein	815074	AT2G05260	no
370	GH9B7	glycosyl hydrolase 9B7	843902	AT1G75680	no
371	UGT76C2	UDP-glucosyl transferase 76C2	830471	AT5G05860	no
372	KCO6	Ca2+ activated outward rectifying K+ channel 6	827541	AT4G18160	no
373	SUR1	Tyrosine transaminase family protein	816585	AT2G20610	no
374	HXK2	hexokinase 2	816505	AT2G19860	no
375	AT5G46870	RNA-binding (RRM/RBD/RNP motifs) family protein	834731	AT5G46870	no
376	AT1G22540	Major facilitator superfamily protein	838860	AT1G22540	no
377	RPB5D	RNA polymerase II fifth largest subunit: D	818732	AT2G41340	no
378	AT3G06035	Glycoprotein membrane precursor GPI-anchored	819776	AT3G06035	no
379	AT1G61795	PAK-box/P21-Rho-binding family protein	5007827	AT1G61795	no
380	RALFL34	ralf-like 34	836842	AT5G67070	no
381	AT5G13360	Auxin-responsive GH3 family protein	831177	AT5G13360	no
382	AT1G13750	Purple acid phosphatases superfamily protein	837935	AT1G13750	no
383	CM3	chorismate mutase 3	843269	AT1G69370	no
384	DJ1F	Class I glutamine amidotransferase-like superfamily protein	824625	AT3G54600	no
385	AT4G11190	Disease resistance-responsive (dirigent-like protein) family protein	826721	AT4G11190	no
386	ANNAT1	annexin 1	840476	AT1G35720	no
387	AT3G03990	alpha/beta-Hydrolases superfamily protein	819554	AT3G03990	no
388	AT1G19000	Homeodomain-like superfamily protein	838481	AT1G19000	no
389	BAM5	beta-amylase 5	827185	AT4G15210	no
390	BIM1	basic helix-loop-helix (bHLH) DNA-binding superfamily protein	830708	AT5G08130	no
391	AT1G26100	Cytochrome b561/ferric reductase transmembrane protein family	839151	AT1G26100	no
392	GAE6	UDP-D-glucuronate 4-epimerase 6	821965	AT3G23820	no
393	AT1G69360	T-box transcription factor: putative (DUF863)	843268	AT1G69360	no
394	PYR4	pyrimidin 4	828392	AT4G22930	no
395	BGAL3	beta-galactosidase 3	829788	AT4G36360	no
396	IAA14	indole-3-acetic acid inducible 14	827102	AT4G14550	no
397	AT5G21100	Plant L-ascorbate oxidase	832234	AT5G21100	no
398	PAP8	purple acid phosphatase 8	814720	AT2G01890	no
399	AT5G19740	Peptidase M28 family protein	832094	AT5G19740	no
400	PRP1	proline-rich protein 1	841938	AT1G54970	no
401	AT3G51450	Calcium-dependent phosphotriesterase superfamily protein	824308	AT3G51450	no
402	GATL5	galacturonosyltransferase 5	839475	AT1G02720	no
403	AT5G19730	Pectin lyase-like superfamily protein	832093	AT5G19730	no
404	AT5G57345	transmembrane protein	835840	AT5G57345	no
405	NET1B	kinase interacting (KIP1-like) family protein	827131	AT4G14760	no
406	AT3G20260	DUF1666 family protein (DUF1666)	821570	AT3G20260	no
407	VSR3	vaculolar sorting receptor 3	815962	AT2G14740	no
408	IQD3	IQ-domain 3	824394	AT3G52290	no
409	AKR4C10	NAD(P)-linked oxidoreductase superfamily protein	818356	AT2G37790	no
410	INT1	inositol transporter 1	818934	AT2G43330	no
411	AT4G15630	Uncharacterized protein family (UPF0497)	827240	AT4G15630	no
412	P5CS1	delta1-pyrroline-5-carboxylate synthase 1	818566	AT2G39800	no
413	AT3G23480	Cyclopropane-fatty-acyl-phospholipid synthase	821929	AT3G23480	no
414	AT5G09300	Thiamin diphosphate-binding fold (THDP-binding) superfamily protein	830789	AT5G09300	no
415	TLP7	tubby like protein 7	841766	AT1G53320	no
416	MES1	methyl esterase 1	816894	AT2G23620	no
417	AT3G07940	Calcium-dependent ARF-type GTPase activating protein family	819985	AT3G07940	no
418	ATB2	NAD(P)-linked oxidoreductase superfamily protein	842365	AT1G60710	no
419	AT1G49650	alpha/beta-Hydrolases superfamily protein	841389	AT1G49650	no
420	NAI2	DNA topoisomerase-like protein	820839	AT3G15950	no
421	CSLA01	cellulose synthase-like A01	827360	AT4G16590	no
422	MLP165	MLP-like protein 165	840415	AT1G35260	no
423	AAE12	acyl activating enzyme 12	842901	AT1G65890	peroxisomes
424	IRX14-L	Nucleotide-diphospho-sugar transferases superfamily protein	836858	AT5G67230	no
425	AT2G04080	MATE efflux family protein	814944	AT2G04080	no
426	NAGS1	N-acetyl-l-glutamate synthase 1	816822	AT2G22910	no
427	AT3G43270	Plant invertase/pectin methylesterase inhibitor superfamily	823402	AT3G43270	no
428	AT1G52245	dynein light chain LC6: flagellar outer arm-like protein	28717345	AT1G52245	no
429	DJ1D	Class I glutamine amidotransferase-like superfamily protein	820875	AT3G02720	no
430	AT3G12965		5007995	AT3G12965	no
431	AT2G37585	Core-2/I-branching beta-1:6-N-acetylglucosaminyltransferase family protein	818335	AT2G37585	no
432	AT1G61065	1:3-beta-glucan synthase component (DUF1218)	842398	AT1G61065	no
433	AT3G13650	Disease resistance-responsive (dirigent-like protein) family protein	820569	AT3G13650	no
434	AT5G00510		28720256	AT5G00510	no
435	IPMI1	isopropylmalate isomerase 1	825068	AT3G58990	no
436	AT5G61890	Integrase-type DNA-binding superfamily protein	836310	AT5G61890	no
437	AT4G23050	PAS domain-containing protein tyrosine kinase family protein	828404	AT4G23050	no
438	PORA	protochlorophyllide oxidoreductase A	835507	AT5G54190	no
439	AT2G04100	MATE efflux family protein	814946	AT2G04100	no
440	AT5G01790	hypothetical protein	831868	AT5G01790	no
441	NIT1	nitrilase 1	823556	AT3G44310	no
442	AT2G38870	Serine protease inhibitor: potato inhibitor I-type family protein	818471	AT2G38870	no
443	LBD16	lateral organ boundaries-domain 16	818843	AT2G42430	no
444	AT2G27360	GDSL-like Lipase/Acylhydrolase superfamily protein	817279	AT2G27360	no
445	AT1G23390	Kelch repeat-containing F-box family protein	838947	AT1G23390	no
446	AT1G01660	RING/U-box superfamily protein	839461	AT1G01660	no
447	AT1G05210	Transmembrane protein 97: Putative	839261	AT1G05210	no
448	OASA1	O-acetylserine (thiol) lyase (OAS-TL)	827145	AT4G14880	no
449	TKPR2	NAD(P)-binding Rossmann-fold superfamily protein	843183	AT1G68540	no
450	AT3G50280	HXXXD-type acyl-transferase family protein	824190	AT3G50280	no
451	SBP3	selenium-binding protein 3	821962	AT3G23800	no
452	AT1G66800	NAD(P)-binding Rossmann-fold superfamily protein	842998	AT1G66800	no
453	MYB102	MYB-like 102	826916	AT4G21440	no
454	AT1G47900	filament-like protein (DUF869)	841207	AT1G47900	no
455	ASAT1	acyl-CoA sterol acyl transferase 1	824360	AT3G51970	no
456	AT3G57062	transmembrane protein	6240237	AT3G57062	no
457	AO1	amine oxidase 1	827152	AT4G14940	no
458	MEB2	Vacuolar iron transporter (VIT) family protein	832496	AT5G24290	no
459	TBL2	trichome birefringence-like protein (DUF828)	842373	AT1G60790	no
460	AT2G42270	U5 small nuclear ribonucleoprotein helicase	818828	AT2G42270	no
461	AT4G24830	arginosuccinate synthase family	828586	AT4G24830	no
462	AT2G43870	Pectin lyase-like superfamily protein	818991	AT2G43870	no
463	AT4G20840	FAD-binding Berberine family protein	827832	AT4G20840	no
464	AT3G09550	Ankyrin repeat family protein	820112	AT3G09550	no
465	MOP10	Pollen Ole e 1 allergen and extensin family protein	830433	AT5G05500	no
466	ABCC14	multidrug resistance-associated protein 10	825444	AT3G62700	no
467	AT3G13845	transmembrane protein	820597	AT3G13845	no
468	PLP9	PATATIN-like protein 9	825495	AT3G63200	no
469	TRM21	methyl-coenzyme M reductase II subunit gamma: putative (DUF3741)	834410	AT5G43880	no
470	MLP43	MLP-like protein 43	843427	AT1G70890	no
471	AT1G31690	Copper amine oxidase family protein	840056	AT1G31690	no
472	SAUR21	ARM repeat superfamily protein	831850	AT5G01830	no
473	TOE3	target of early activation tagged (EAT) 3	836853	AT5G67180	no
474	AT2G39280	Ypt/Rab-GAP domain of gyp1p superfamily protein	818513	AT2G39280	no
475	SAM1	S-adenosylmethionine synthetase 1	839501	AT1G02500	no
476	PAO3	polyamine oxidase 3	825074	AT3G59050	peroxisomes
477	AT1G73325	Kunitz family trypsin and protease inhibitor protein	843667	AT1G73325	no
478	AT3G53830	Regulator of chromosome condensation (RCC1) family protein	824550	AT3G53830	no
479	PUB43	ARM repeat superfamily protein	843971	AT1G76390	no
480	VTC5	GDP-L-galactose phosphorylase VITAMIN C DEFECTIVE 5 (VTC5)	835603	AT5G55120	no
481	AT1G52710	Rubredoxin-like superfamily protein	841704	AT1G52710	no
482	PME1	pectin methylesterase 1	841821	AT1G53840	no
483	AT3G47680	DNA binding protein	823922	AT3G47680	no
484	AT5G58000	Reticulon family protein	835911	AT5G58000	no
485	AT2G21840	Cysteine/Histidine-rich C1 domain family protein	816720	AT2G21840	no
486	RWA2	O-acetyltransferase family protein	819834	AT3G06550	no
487	AT5G59350	transmembrane protein	836054	AT5G59350	no
488	AT3G53600	C2H2-type zinc finger family protein	824528	AT3G53600	no
489	AT3G24420	alpha/beta-Hydrolases superfamily protein	822032	AT3G24420	no
490	AT4G38950	ATP binding microtubule motor family protein	830050	AT4G38950	no
491	SDRd	NAD(P)-binding Rossmann-fold superfamily protein	824695	AT3G55290	peroxisomes
492	AT1G76240	DUF241 domain protein (DUF241)	843957	AT1G76240	no
493	HVA22D	HVA22 homologue D	828598	AT4G24960	no
494	NDPK3	nucleoside diphosphate kinase 3	826702	AT4G11010	no
495	AT3G54970	D-aminoacid aminotransferase-like PLP-dependent enzymes superfamily protein	824662	AT3G54970	no
496	AT4G31290	ChaC-like family protein	829256	AT4G31290	no
497	AT5G04320	Shugoshin C terminus	830311	AT5G04320	no
498	AT2G43540	transmembrane protein	818956	AT2G43540	no
499	GLY3	glyoxalase II 3	841793	AT1G53580	no
500	AT4G16957	SUPPRESSOR OF: CONSTITUTIVE protein	28720140	AT4G16957	no
501	AT1G69080	Adenine nucleotide alpha hydrolases-like superfamily protein	843240	AT1G69080	no
502	ERL2	ERECTA-like 2	830609	AT5G07180	no
503	SP1L4	SPIRAL1-like4	831412	AT5G15600	no
504	AT4G31100	wall-associated kinase	829237	AT4G31100	no
505	AT4G36660	polyol transporter: putative (DUF1195)	829819	AT4G36660	no
506	GLR5	glutamate receptor 5	817801	AT2G32400	no
507	AT1G29025	Calcium-binding EF-hand family protein	10723075	AT1G29025	no
508	AT2G46100	Nuclear transport factor 2 (NTF2) family protein	819218	AT2G46100	no
509	OASC	O-acetylserine (thiol) lyase	825145	AT3G59760	no
510	BGAL5	beta-galactosidase 5	841080	AT1G45130	no
511	AT1G35180	TRAM: LAG1 and CLN8 (TLC) lipid-sensing domain containing protein	840405	AT1G35180	no
512	UDG4	UDP-glucose 6-dehydrogenase family protein	833928	AT5G39320	no
513	PRP3	proline-rich protein 3	825442	AT3G62680	no
514	MEE25	NAD(P)-binding Rossmann-fold superfamily protein	818050	AT2G34850	no
515	PMEAMT	S-adenosyl-L-methionine-dependent methyltransferases superfamily protein	841281	AT1G48600	no
516	CMT2	chromomethylase 2	827640	AT4G19020	no
517	AT5G38020	S-adenosyl-L-methionine-dependent methyltransferases superfamily protein	833781	AT5G38020	no
518	AT2G43800	Actin-binding FH2 (formin homology 2) family protein	818984	AT2G43800	no
519	CKX5	cytokinin oxidase 5	843881	AT1G75450	no
520	AT3G23570	alpha/beta-Hydrolases superfamily protein	821936	AT3G23570	no
521	BCAT4	branched-chain aminotransferase4	821508	AT3G19710	no
522	ATMS1	Cobalamin-independent synthase family protein	831660	AT5G17920	peroxisomes
523	AT2G46140	Late embryogenesis abundant protein	819221	AT2G46140	no
524	AT3G49960	Peroxidase superfamily protein	824158	AT3G49960	no
525	XTH13	xyloglucan endotransglucosylase/hydrolase 13	835858	AT5G57540	no
526	AT2G43535	Scorpion toxin-like knottin superfamily protein	818955	AT2G43535	no
527	AT4G26540	Leucine-rich repeat receptor-like protein kinase family protein	828760	AT4G26540	no
528	AT1G30870	Peroxidase superfamily protein	839971	AT1G30870	no
529	AT5G23920	transmembrane protein	832457	AT5G23920	no
530	AT1G69450	Early-responsive to dehydration stress protein (ERD4)	843277	AT1G69450	no
531	CAMS1	camelliol C synthase 1	844235	AT1G78955	no
532	AT2G38010	Neutral/alkaline non-lysosomal ceramidase	818379	AT2G38010	no
533	AT1G03920	Protein kinase family protein	839369	AT1G03920	no
534	PERK13	root hair specific 10	843382	AT1G70460	no
535	ADK1	adenosine kinase 1	820140	AT3G09820	no
536	AT1G56670	GDSL-like Lipase/Acylhydrolase superfamily protein	842122	AT1G56670	no
537	AT1G10900	Phosphatidylinositol-4-phosphate 5-kinase family protein	837633	AT1G10900	no
538	ARF11	auxin response factor 11	819264	AT2G46530	no
539	AT1G10090	Early-responsive to dehydration stress protein (ERD4)	837544	AT1G10090	no
540	AT5G62350	Plant invertase/pectin methylesterase inhibitor superfamily protein	836356	AT5G62350	no
541	ICS2	isochorismate synthase 2	838468	AT1G18870	no
542	RHA3A	RING-H2 finger A3A	816251	AT2G17450	no
543	CEP3	Cysteine proteinases superfamily protein	823993	AT3G48350	no
544	BEN1	NAD(P)-binding Rossmann-fold superfamily protein	819146	AT2G45400	no
545	RAB7A	RAB GTPase homolog 7A	816724	AT2G21880	no
546	CYSD1	cysteine synthase D1	819654	AT3G04940	no
547	GolS3	galactinol synthase 3	837457	AT1G09350	no
548	STR16	sulfurtransferase protein 16	836734	AT5G66040	no
549	AT5G57625	CAP (Cysteine-rich secretory proteins: Antigen 5: and Pathogenesis-related 1 protein) superfamily protein	835867	AT5G57625	no
550	FUM2	FUMARASE 2	835168	AT5G50950	no
551	AT5G40090	Disease resistance protein (TIR-NBS class)	834006	AT5G40090	no
552	P1R1	transcription factor	835886	AT5G57780	no
553	HEMD	uroporphyrinogen-III synthase family protein	817195	AT2G26540	no
554	AT4G08690	Sec14p-like phosphatidylinositol transfer family protein	826436	AT4G08690	no
555	HIPP25	Heavy metal transport/detoxification superfamily protein	829658	AT4G35060	no
556	LecRK-I.9	Concanavalin A-like lectin protein kinase family protein	836152	AT5G60300	no
557	AT5G24165	hypothetical protein	832483	AT5G24165	no
558	SNZ	Integrase-type DNA-binding superfamily protein	818510	AT2G39250	no
559	AT3G46700	UDP-Glycosyltransferase superfamily protein	823823	AT3G46700	no
560	PDLP1	plasmodesmata-located protein 1	834421	AT5G43980	no
561	AT4G21910	MATE efflux family protein	828280	AT4G21910	no
562	CPUORF47	peptide upstream protein	831909	AT5G03190	no
563	TINY2	Integrase-type DNA-binding superfamily protein	831031	AT5G11590	no
564	AT1G68945	hypothetical protein	843229	AT1G68945	no
565	AT2G44940	Integrase-type DNA-binding superfamily protein	819103	AT2G44940	no
566	AT2G24550	major centromere autoantigen B-like protein	816991	AT2G24550	no
567	PROPEP4	elicitor peptide 4 precursor	830859	AT5G09980	no
568	AT4G27870	Vacuolar iron transporter (VIT) family protein	828900	AT4G27870	no
569	PAP28	purple acid phosphatase 28	835820	AT5G57140	no
570	HCF109	high chlorophyll fluorescent 109	833614	AT5G36170	no
571	SMZ	Integrase-type DNA-binding superfamily protein	824664	AT3G54990	no
572	NIMIN-2	NIM1-interacting 2	822184	AT3G25882	no
573	AT1G61500	S-locus lectin protein kinase family protein	842444	AT1G61500	no
574	TIL	temperature-induced lipocalin	835919	AT5G58070	no
575	AT1G67750	Pectate lyase family protein	843100	AT1G67750	no
576	AT1G47530	MATE efflux family protein	841162	AT1G47530	no
577	FMO GS-OX2	flavin-monooxygenase glucosinolate S-oxygenase 2	842551	AT1G62540	no
578	POM1	Chitinase family protein	837095	AT1G05850	no
579	AT1G01715	hypothetical protein	28716021	AT1G01715	no
580	GATA6	GATA transcription factor 6	824272	AT3G51080	no
581	AT5G43040	Cysteine/Histidine-rich C1 domain family protein	834319	AT5G43040	no
582	AT5G19070	SNARE associated Golgi protein family	832026	AT5G19070	no
583	JAL31	jacalin-related lectin 31	820891	AT3G16430	no
584	AT3G59750	Concanavalin A-like lectin protein kinase family protein	825144	AT3G59750	no
585	GLX1	glyoxalase/bleomycin resistance protein/dioxygenase superfamily protein	837731	AT1G11840	peroxisomes
586	AT2G23120	Late embryogenesis abundant protein: group 6	816844	AT2G23120	no
587	AT5G07310	Integrase-type DNA-binding superfamily protein	830622	AT5G07310	no
588	AT1G77420	alpha/beta-Hydrolases superfamily protein	844079	AT1G77420	no
589	CYP94C1	cytochrome P450: family 94: subfamily C: polypeptide 1	817315	AT2G27690	no
590	GTR1	Major facilitator superfamily protein	823951	AT3G47960	no
591	AT3G26950	transmembrane protein	822313	AT3G26950	no
592	NAC083	NAC domain containing protein 83	831157	AT5G13180	no
593	PLC1	phospholipase C1	835981	AT5G58670	no
594	AT2G30740	Protein kinase superfamily protein	817625	AT2G30740	no
595	ILR1	Peptidase M20/M25/M40 family protein	821199	AT3G02875	no
596	AT5G38010	UDP-Glycosyltransferase superfamily protein	833780	AT5G38010	no
597	GLK2	GOLDEN2-like 2	834442	AT5G44190	no
598	GATA7	GATA transcription factor 7	829781	AT4G36240	no
599	ELF4-L3	ELF4-like 3	815182	AT2G06255	no
600	GIS	C2H2 and C2HC zinc fingers superfamily protein	824976	AT3G58070	no
601	AT5G65530	Protein kinase superfamily protein	836679	AT5G65530	no
602	AT2G47670	Plant invertase/pectin methylesterase inhibitor superfamily protein	819380	AT2G47670	no
603	AT3G59330	solute carrier family 35 protein (DUF914)	825102	AT3G59330	no
604	AT3G18930	RING/U-box superfamily protein	821425	AT3G18930	no
605	AT5G38100	S-adenosyl-L-methionine-dependent methyltransferases superfamily protein	833790	AT5G38100	no
606	CESA5	cellulose synthase 5	830847	AT5G09870	no
607	NSP4	nitrile specifier protein 4	820888	AT3G16410	no
608	AT5G14790	ARM repeat superfamily protein	831331	AT5G14790	no
609	GRF2	growth-regulating factor 2	829930	AT4G37740	no
610	XT2	UDP-xylosyltransferase 2	827940	AT4G02500	no
611	AT5G09820	Plastid-lipid associated protein PAP / fibrillin family protein	830842	AT5G09820	no
612	MAM1	methylthioalkylmalate synthase 1	832365	AT5G23010	no
613	TSB2	tryptophan synthase beta-subunit 2	828815	AT4G27070	no
614	AT2G29620	dentin sialophosphoprotein	817512	AT2G29620	no
615	WOL	CHASE domain containing histidine kinase protein	814714	AT2G01830	no
616	TIFY7	TIFY domain/Divergent CCT motif family protein	843407	AT1G70700	no
617	WRKY8	WRKY DNA-binding protein 8	834678	AT5G46350	no
618	AT3G24670	Pectin lyase-like superfamily protein	822063	AT3G24670	no
619	AT5G63500	transmembrane protein: putative (DUF 3339)	836469	AT5G63500	no
620	UMAMIT44	nodulin MtN21 /EamA-like transporter family protein	822437	AT3G28130	no
621	AR781	AR781: pheromone receptor-like protein (DUF1645)	817194	AT2G26530	no
622	AT1G34844		5007752	AT1G34844	no
623	UGT71B5	UDP-glucosyl transferase 71B5	827194	AT4G15280	no
624	SAMC1	S-adenosylmethionine carrier 1	830101	AT4G39460	no
625	PAH1	Lipin family protein	820113	AT3G09560	no
626	ARR4	response regulator 4	837587	AT1G10470	no
627	ERF15	ethylene-responsive element binding factor 15	817680	AT2G31230	no
628	AT5G57830	zein-binding protein (Protein of unknown function: DUF593)	835893	AT5G57830	no
629	AT2G47540	Pollen Ole e 1 allergen and extensin family protein	819367	AT2G47540	no
630	ERD9	Glutathione S-transferase family protein	837576	AT1G10370	no
631	AT2G23755	transmembrane family 220 helix protein	816907	AT2G23755	no
632	AT5G15740	O-fucosyltransferase family protein	831430	AT5G15740	no
633	UNE7	Core-2/I-branching beta-1:6-N-acetylglucosaminyltransferase family protein	821186	AT3G03690	no
634	AT5G03406	Class II aaRS and biotin synthetases superfamily protein	3770629	AT5G03406	no
635	DHAR1	dehydroascorbate reductase	838544	AT1G19570	peroxisomes
636	AT1G76360	Protein kinase superfamily protein	843968	AT1G76360	no
637	AT4G17610	tRNA/rRNA methyltransferase (SpoU) family protein	827480	AT4G17610	no
638	GHR1	Leucine-rich receptor-like protein kinase family protein	827842	AT4G20940	no
639	AT2G38240	2-oxoglutarate (2OG) and Fe(II)-dependent oxygenase superfamily protein	818403	AT2G38240	no
640	AT2G25220	Protein kinase superfamily protein	817060	AT2G25220	no
641	SGP2	Ras-related small GTP-binding family protein	821724	AT3G21700	no
642	AT1G53060	Legume lectin family protein	841740	AT1G53060	no
643	AT4G12000	SNARE associated Golgi protein family	826807	AT4G12000	no
644	AT2G21830	Cysteine/Histidine-rich C1 domain family protein	816719	AT2G21830	no
645	MTHFR1	methylenetetrahydrofolate reductase 1	825167	AT3G59970	no
646	AT5G20550	2-oxoglutarate (2OG) and Fe(II)-dependent oxygenase superfamily protein	832177	AT5G20550	no
647	AT5G24620	Pathogenesis-related thaumatin superfamily protein	832533	AT5G24620	no
648	ESL1	ERD (early response to dehydration) six-like 1	837413	AT1G08920	no
649	AT5G53990	UDP-Glycosyltransferase superfamily protein	835482	AT5G53990	no
650	CYP71B26	cytochrome P450: family 71: subfamily B: polypeptide 26	822232	AT3G26290	no
651	AT5G27410	D-aminoacid aminotransferase-like PLP-dependent enzymes superfamily protein	832800	AT5G27410	no
652	PIP2;4	plasma membrane intrinsic protein 2;4	836187	AT5G60660	no
653	TOM1	tobamovirus multiplication 1	828267	AT4G21790	no
654	AT2G04400	Aldolase-type TIM barrel family protein	814980	AT2G04400	no
655	URH2	uridine-ribohydrolase 2	837068	AT1G05620	no
656	AT5G03640	Protein kinase superfamily protein	831770	AT5G03640	no
657	NHX2	sodium hydrogen exchanger 2	819665	AT3G05030	no
658	AT5G66590	CAP (Cysteine-rich secretory proteins: Antigen 5: and Pathogenesis-related 1 protein) superfamily protein	836791	AT5G66590	no
659	AT5G19850	alpha/beta-Hydrolases superfamily protein	832105	AT5G19850	no
660	DUF 10	agenet domain protein (DOMAIN OF UNKNOWN FUNCTION 724 10)	832445	AT5G23800	no
661	GATL2	galacturonosyltransferase-like 2	824240	AT3G50760	no
662	AT4G21570	organic solute transporter ostalpha protein (DUF300)	828242	AT4G21570	no
663	AT1G53560	Ribosomal protein L18ae family	841791	AT1G53560	no
664	RHS13	root hair specific 13	828083	AT4G02270	no
665	AT3G27420	bromodomain testis-specific protein	822363	AT3G27420	no
666	FMO GS-OX3	flavin-monooxygenase glucosinolate S-oxygenase 3	842553	AT1G62560	no
667	AT3G51950	Zinc finger (CCCH-type) family protein / RNA recognition motif (RRM)-containing protein	824358	AT3G51950	no
668	AT4G22120	ERD (early-responsive to dehydration stress) family protein	828301	AT4G22120	no
669	EDS5	MATE efflux family protein	830058	AT4G39030	no
670	AT5G54145	hypothetical protein	835502	AT5G54145	no
671	SOT17	sulfotransferase 17	838440	AT1G18590	no
672	AT3G61490	Pectin lyase-like superfamily protein	825322	AT3G61490	no
673	MSR1	O-fucosyltransferase family protein	821672	AT3G21190	no
674	MRU1	mto 1 responding up 1	833513	AT5G35490	no
675	BLH2	BEL1-like homeodomain 2	829840	AT4G36870	no
676	PPD1	TIFY domain/Divergent CCT motif family protein	827123	AT4G14713	no
677	RXW8	GDSL-like lipase/acylhydrolase superfamily protein	842218	AT1G58520	no
678	AT4G21060	Galactosyltransferase family protein	827853	AT4G21060	no
679	AT3G55720	replication factor C subunit: putative (DUF620)	824738	AT3G55720	no
680	AT1G27420	Galactose oxidase/kelch repeat superfamily protein	839632	AT1G27420	no
681	AT5G54855	Pollen Ole e 1 allergen and extensin family protein	835576	AT5G54855	no
682	AVA-P1	ATPase: F0/V0 complex: subunit C protein	829624	AT4G34720	no
683	AT2G34840	Coatomer epsilon subunit	818049	AT2G34840	no
684	ERF38	ERF family protein 38	818139	AT2G35700	no
685	AT4G26180	Mitochondrial substrate carrier family protein	828724	AT4G26180	no
686	AT5G04160	Nucleotide-sugar transporter family protein	830294	AT5G04160	no
687	AT3G49650	P-loop containing nucleoside triphosphate hydrolases superfamily protein	824127	AT3G49650	no
688	AT4G38810	Calcium-binding EF-hand family protein	830036	AT4G38810	no
689	AT3G56300	Cysteinyl-tRNA synthetase: class Ia family protein	824797	AT3G56300	no
690	AT1G22430	GroES-like zinc-binding dehydrogenase family protein	838849	AT1G22430	no
691	MSRB5	methionine sulfoxide reductase B5	825820	AT4G04830	no
692	AT1G78070	Transducin/WD40 repeat-like superfamily protein	844142	AT1G78070	no
693	AIB	ABA-inducible BHLH-type transcription factor	819262	AT2G46510	no
694	MYB23	myb domain protein 23	834031	AT5G40330	no
695	GA3OX1	gibberellin 3-oxidase 1	838125	AT1G15550	no
696	AT3G52748		5008083	AT3G52748	no
697	AT5G47510	Sec14p-like phosphatidylinositol transfer family protein	834801	AT5G47510	no
698	AT3G55920	Cyclophilin-like peptidyl-prolyl cis-trans isomerase family protein	824758	AT3G55920	no
699	AT5G48960	HAD-superfamily hydrolase: subfamily IG: 5'-nucleotidase	834954	AT5G48960	no
700	AT5G35480	hypothetical protein	833512	AT5G35480	no
701	AT1G13650	hypothetical protein	837926	AT1G13650	no
702	BCAT3	branched-chain aminotransferase 3	824130	AT3G49680	no
703	AT3G54460	SNF2 domain-containing protein / helicase domain-containing protein / F-box family protein	824611	AT3G54460	no
704	ABCG41	pleiotropic drug resistance 13	827186	AT4G15215	no
705	AT5G27930	Protein phosphatase 2C family protein	832860	AT5G27930	no
706	AT2G26690	Major facilitator superfamily protein	817210	AT2G26690	no
707	AT2G46580	Pyridoxamine 5'-phosphate oxidase family protein	819270	AT2G46580	no
708	MES5	methyl esterase 5	830894	AT5G10300	no
709	AAP7	amino acid permease 7	832446	AT5G23810	no
710	AT4G16765	2-oxoglutarate (2OG) and Fe(II)-dependent oxygenase superfamily protein	827382	AT4G16765	no
711	AT2G31585		5007916	AT2G31585	no
712	AT3G17130	Plant invertase/pectin methylesterase inhibitor superfamily protein	820970	AT3G17130	no
713	AT1G18460	alpha/beta-Hydrolases superfamily protein	838426	AT1G18460	no
714	PLDBETA2	phospholipase D beta 2	826673	AT4G00240	no
715	NSP1	nitrile specifier protein 1	820887	AT3G16400	no
716	AT1G67148	hypothetical protein	5007836	AT1G67148	no
717	AT4G02825		28719443	AT4G02825	no
718	CRR3	chlororespiratory reduction 3	814688	AT2G01590	no
719	AT3G27470	lysine ketoglutarate reductase trans-splicing protein (DUF707)	822368	AT3G27470	no
720	AT3G11580	AP2/B3-like transcriptional factor family protein	820331	AT3G11580	no
721	CYP71B37	cytochrome P450: family 71: subfamily B: polypeptide 37	822237	AT3G26330	no
722	AT3G51340	Eukaryotic aspartyl protease family protein	824297	AT3G51340	no
723	AT3G07350	sulfate/thiosulfate import ATP-binding protein: putative (DUF506)	819923	AT3G07350	no
724	HDG11	homeodomain GLABROUS 11	843671	AT1G73360	no
725	AT4G26790	GDSL-like Lipase/Acylhydrolase superfamily protein	828786	AT4G26790	no
726	AT5G58800	Quinone reductase family protein	835997	AT5G58800	no
727	AT4G03610	Metallo-hydrolase/oxidoreductase superfamily protein	825661	AT4G03610	no
728	AT5G43730	Disease resistance protein (CC-NBS-LRR class) family	834393	AT5G43730	no
729	PGL4	6-phosphogluconolactonase 4	832512	AT5G24410	no
730	PIF7	phytochrome-interacting factor7	836248	AT5G61270	no
731	AT4G38350	Patched family protein	829992	AT4G38350	no
732	CYP86A8	cytochrome P450: family 86: subfamily A: polypeptide 8	819205	AT2G45970	no
733	AT1G22910	RNA-binding (RRM/RBD/RNP motifs) family protein	838898	AT1G22910	no
734	IRX15-L	IRREGULAR XYLEM protein (DUF579)	836856	AT5G67210	no
735	AT1G80570	RNI-like superfamily protein	844396	AT1G80570	no
736	MSL9	mechanosensitive channel of small conductance-like 9	832072	AT5G19520	no
737	TSA1	TSK-associating protein 1	841671	AT1G52410	peroxisomes
738	AT5G66600	electron transporter: putative (Protein of unknown function: DUF547)	836792	AT5G66600	no
739	WNK9	Protein kinase superfamily protein	832881	AT5G28080	no
740	AT2G37100	protamine P1 family protein	818286	AT2G37100	no
741	AT2G40260	Homeodomain-like superfamily protein	818618	AT2G40260	no
742	NAP1;4	nucleosome assembly protein1;4	820589	AT3G13782	no
743	AT5G61670	orange protein	836289	AT5G61670	no
744	DHS1	3-deoxy-D-arabino-heptulosonate 7-phosphate synthase 1	830159	AT4G39980	no
745	AT5G06270	hypothetical protein	830515	AT5G06270	no
746	AT5G13090	hypothetical protein	831148	AT5G13090	no
747	HCF107	high chlorophyll fluorescent 107	820961	AT3G17040	no
748	AT2G32580	transmembrane protein: putative (DUF1068)	817818	AT2G32580	no
749	AT1G68670	myb-like transcription factor family protein	843197	AT1G68670	no
750	AT5G43150	elongation factor	834332	AT5G43150	no
751	AT4G25790	CAP (Cysteine-rich secretory proteins: Antigen 5: and Pathogenesis-related 1 protein) superfamily protein	828684	AT4G25790	no
752	HL	HAL2-like protein	835527	AT5G54390	no
753	ROPGEF4	RHO guanyl-nucleotide exchange factor 4	819197	AT2G45890	no
754	BTI3	VIRB2-interacting protein 3	834162	AT5G41600	no
755	AT5G44920	Toll-Interleukin-Resistance (TIR) domain family protein	834522	AT5G44920	no
756	AT3G52740	hypothetical protein	824440	AT3G52740	no
757	AT5G19630	alpha/beta-Hydrolases superfamily protein	832083	AT5G19630	no
758	AT4G28840	mediator of RNA polymerase II transcription subunit	829005	AT4G28840	no
759	PSD2	phosphatidylserine decarboxylase 2	835825	AT5G57190	no
760	AXR3	AUX/IAA transcriptional regulator family protein	839568	AT1G04250	no
761	EXT6	Proline-rich extensin-like family protein	817037	AT2G24980	no
762	EXT10	Proline-rich extensin-like family protein	830552	AT5G06640	no
763	AT4G38900	Basic-leucine zipper (bZIP) transcription factor family protein	830045	AT4G38900	no
764	LOX1	lipoxygenase 1	841944	AT1G55020	no
765	KNAT7	homeobox knotted-like protein	842602	AT1G62990	no
766	AT2G25200	hypothetical protein (DUF868)	817058	AT2G25200	no
767	AT3G55420	hypothetical protein	824708	AT3G55420	no
768	AT4G13110	BSD domain-containing protein	826925	AT4G13110	no
769	AT3G14220	GDSL-like Lipase/Acylhydrolase superfamily protein	820640	AT3G14220	no
770	JAR1	Auxin-responsive GH3 family protein	819244	AT2G46370	no
771	CXE5	carboxyesterase 5	841390	AT1G49660	no
772	AT5G13200	GRAM domain family protein	831159	AT5G13200	no
773	CSLA11	cellulose synthase like A11	831477	AT5G16190	no
774	AT5G26280	TRAF-like family protein	832697	AT5G26280	no
775	PRA1.B4	prenylated RAB acceptor 1.B4	818416	AT2G38360	no
776	MAP65-2	microtubule-associated protein 65-2	828783	AT4G26760	no
777	AT5G20700	senescence-associated family protein: putative (DUF581)	832193	AT5G20700	no
778	GLR2.1	glutamate receptor 2.1	832768	AT5G27100	no
779	AT2G14520	CBS domain protein (DUF21)	815939	AT2G14520	no
780	ERO1	endoplasmic reticulum oxidoreductins 1	843560	AT1G72280	no
781	SCPL27	serine carboxypeptidase-like 27	819990	AT3G07990	no
782	AT5G41620	intracellular protein transporter USO1-like protein	834164	AT5G41620	no
783	BLH7	BEL1-like homeodomain 7	816137	AT2G16400	no
784	PUT4	Amino acid permease family protein	820565	AT3G13620	no
785	ATK2	kinesin 2	828826	AT4G27180	no
786	AT5G19290	alpha/beta-Hydrolases superfamily protein	832049	AT5G19290	no
787	PNC2	peroxisomal adenine nucleotide carrier 2	832812	AT5G27520	peroxisomes
788	SCPL11	serine carboxypeptidase-like 11	816828	AT2G22970	no
789	AT5G42740	Sugar isomerase (SIS) family protein	834283	AT5G42740	no
790	AT5G65990	Transmembrane amino acid transporter family protein	836729	AT5G65990	no
791	ILL6	IAA-amino acid hydrolase ILR1-like 6	841026	AT1G44350	no
792	AS2	Lateral organ boundaries (LOB) domain family protein	842873	AT1G65620	no
793	HRGP1	hydroxyproline-rich glycoprotein	824624	AT3G54590	no
794	MYB16	myb domain protein 16	831383	AT5G15310	no
795	WPP1	WPP domain protein 1	834323	AT5G43070	no
796	AT5G37550	hypothetical protein	833733	AT5G37550	no
797	CP5	Polyketide cyclase/dehydrase and lipid transport superfamily protein	842780	AT1G64720	no
798	AT4G14240	CBS domain protein with a domain protein (DUF21)	827065	AT4G14240	no
799	AT1G03270	CBS domain protein with a domain protein (DUF21)	838595	AT1G03270	no
800	AT1G12244	Polynucleotidyl transferase: ribonuclease H-like superfamily protein	3766708	AT1G12244	no
801	MIR850		6240929	AT4G13493	no
802	PLAT2	Lipase/lipooxygenase: PLAT/LH2 family protein	816751	AT2G22170	no
803	AT5G14360	Ubiquitin-like superfamily protein	831287	AT5G14360	no
804	AT5G22390	FANTASTIC four-like protein (DUF3049)	832300	AT5G22390	no
805	AT5G04960	Plant invertase/pectin methylesterase inhibitor superfamily	830378	AT5G04960	no
806	AT1G49570	Peroxidase superfamily protein	841381	AT1G49570	no
807	NF-YA7	nuclear factor Y: subunit A7	839929	AT1G30500	no
808	HOG1	S-adenosyl-L-homocysteine hydrolase	827028	AT4G13940	no
809	NQR	NADPH:quinone oxidoreductase	822411	AT3G27890	no
810	NATA1	Acyl-CoA N-acyltransferases (NAT) superfamily protein	818489	AT2G39030	no
811	AT1G65985	transmembrane protein: putative (DUF247)	842911	AT1G65985	no
812	AT5G42690	transcription factor: putative (Protein of unknown function: DUF547)	834278	AT5G42690	no
813	AT5G26670	Pectinacetylesterase family protein	832722	AT5G26670	no
814	AT1G52825	sporulation-specific protein	841716	AT1G52825	no
815	AT5G17700	MATE efflux family protein	831637	AT5G17700	no
816	AT2G34810	FAD-binding Berberine family protein	818046	AT2G34810	no
817	AT4G22305	alpha/beta-Hydrolases superfamily protein	10723040	AT4G22305	no
818	AT5G17530	phosphoglucosamine mutase family protein	831619	AT5G17530	no
819	AT2G32970	G1/S-specific cyclin-E protein	817859	AT2G32970	no
820	AT1G50732	transmembrane protein	10723115	AT1G50732	no
821	BGLU16	beta glucosidase 16	825183	AT3G60130	no
822	AT4G26255		5008165	AT4G26255	no
823	AT3G05937	hypothetical protein	2745871	AT3G05937	no
824	PDIL1-5	PDI-like 1-5	841656	AT1G52260	no
825	AT3G49410	Transcription factor IIIC: subunit 5	824103	AT3G49410	no
826	AZG1	AZA-guanine resistant1	820267	AT3G10960	no
827	MAT3	methionine adenosyltransferase 3	818260	AT2G36880	no
828	ABA4	abscisic acid (aba)-deficient 4	843028	AT1G67080	no
829	AT1G76110	HMG (high mobility group) box protein with ARID/BRIGHT DNA-binding domain-containing protein	843943	AT1G76110	no
830	AT3G22810	auxin canalization protein (DUF828)	821852	AT3G22810	no
831	AT1G28580	GDSL-like Lipase/Acylhydrolase superfamily protein	839758	AT1G28580	no
832	AT5G19760	Mitochondrial substrate carrier family protein	832096	AT5G19760	no
833	AT5G59490	Haloacid dehalogenase-like hydrolase (HAD) superfamily protein	836068	AT5G59490	no
834	AT5G04020	calmodulin binding protein	830281	AT5G04020	no
835	AT4G02360	transmembrane protein: putative (Protein of unknown function: DUF538)	827767	AT4G02360	no
836	AT3G07555		28719006	AT3G07555	no
837	AT1G69790	Protein kinase superfamily protein	843315	AT1G69790	no
838	AT3G10405	vacuolar acid trehalase	820204	AT3G10405	no
839	AT5G51390	hypothetical protein	835213	AT5G51390	no
840	AT5G53090	NAD(P)-binding Rossmann-fold superfamily protein	835389	AT5G53090	no
841	AT1G17350	NADH:ubiquinone oxidoreductase intermediate-associated protein 30	838307	AT1G17350	no
842	KT2	potassium transporter 2	818649	AT2G40540	no
843	AFP3	ABI five binding protein 3	822619	AT3G29575	no
844	MSL4	mechanosensitive channel of small conductance-like 4	841782	AT1G53470	no
845	AT2G40460	Major facilitator superfamily protein	818640	AT2G40460	no
846	AT2G18560	UDP-Glycosyltransferase superfamily protein	816371	AT2G18560	no
847	AT5G44820	Nucleotide-diphospho-sugar transferase family protein	834512	AT5G44820	no
848	AT5G56520	hypothetical protein	835753	AT5G56520	no
849	HEMA1	Glutamyl-tRNA reductase family protein	842198	AT1G58290	no
850	MYB7	myb domain protein 7	816173	AT2G16720	no
851	ECHID	enoyl-CoA hydratase/isomerase D	842350	AT1G60550	peroxisomes
852	AT2G16005	MD-2-related lipid recognition domain-containing protein	816096	AT2G16005	no
853	SOX	FAD-dependent oxidoreductase family protein	816994	AT2G24580	peroxisomes
854	AT3G46430	ATP synthase	823793	AT3G46430	no
855	AT3G47380	Plant invertase/pectin methylesterase inhibitor superfamily protein	823892	AT3G47380	no
856	GATA12	GATA transcription factor 12	832652	AT5G25830	no
857	AT3G05910	Pectinacetylesterase family protein	819760	AT3G05910	no
858	AGP3	arabinogalactan protein 3	830172	AT4G40090	no
859	AT2G22900	Galactosyl transferase GMA12/MNN10 family protein	816821	AT2G22900	no
860	AT5G67150	HXXXD-type acyl-transferase family protein	836850	AT5G67150	no
861	AT4G13840	HXXXD-type acyl-transferase family protein	827018	AT4G13840	no
862	MYB84	myb domain protein 84	824131	AT3G49690	no
863	AT1G34060	Pyridoxal phosphate (PLP)-dependent transferases superfamily protein	840303	AT1G34060	no
864	Rap2.6L	related to AP2 6l	831174	AT5G13330	no
865	AT2G31790	UDP-Glycosyltransferase superfamily protein	817736	AT2G31790	no
866	AT3G47540	Chitinase family protein	823908	AT3G47540	no
867	CYP96A4	cytochrome P450: family 96: subfamily A: polypeptide 4	835308	AT5G52320	no
868	ATCAD4	GroES-like zinc-binding alcohol dehydrogenase family protein	821479	AT3G19450	no
869	AT2G11225	hypothetical protein	28718249	AT2G11225	no
870	AT5G57150	basic helix-loop-helix (bHLH) DNA-binding superfamily protein	835821	AT5G57150	no
871	AT1G51310	tRNA (5-methylaminomethyl-2-thiouridylate)-methyltransferase	841554	AT1G51310	no
872	LEP	Integrase-type DNA-binding superfamily protein	831238	AT5G13910	no
873	EXT12	Proline-rich extensin-like family protein	826970	AT4G13390	no
874	CESA2	cellulose synthase A2	830090	AT4G39350	no
875	AT2G44360	ecotropic viral integration site protein	819043	AT2G44360	no
876	AT2G18750	Calmodulin-binding protein	816390	AT2G18750	no
877	AT3G50840	Phototropic-responsive NPH3 family protein	824248	AT3G50840	no
878	APC3	Mitochondrial substrate carrier family protein	830623	AT5G07320	no
879	AT3G49370	Calcium-dependent protein kinase (CDPK) family protein	824099	AT3G49370	no
880	GASA4	GAST1 protein homolog 4	831375	AT5G15230	no
881	AT4G15955	alpha/beta-Hydrolases superfamily protein	827278	AT4G15955	no
882	SSP4b	SCP1-like small phosphatase 4b	827539	AT4G18140	no
883	CYCA2;3	CYCLIN A2;3	838127	AT1G15570	no
884	AT2G31141	hypothetical protein	6240467	AT2G31141	no
885	CYP94B3	cytochrome P450: family 94: subfamily B: polypeptide 3	824011	AT3G48520	no
886	PSK2	phytosulfokine 2 precursor	816817	AT2G22860	no
887	AT4G02850	phenazine biosynthesis PhzC/PhzF family protein	828160	AT4G02850	no
888	PRS3	phosphoribosyl pyrophosphate (PRPP) synthase 3	837613	AT1G10700	no
889	AT5G17780	alpha/beta-Hydrolases superfamily protein	831646	AT5G17780	no
890	AT3G07570	Cytochrome b561/ferric reductase transmembrane with DOMON related domain-containing protein	819948	AT3G07570	no
891	AT5G66580	hypothetical protein	836790	AT5G66580	no
892	AT1G38131	O-fucosyltransferase family protein	840652	AT1G38131	no
893	GT72B1	UDP-Glycosyltransferase superfamily protein	827912	AT4G01070	no
894	JAZ7	jasmonate-zim-domain protein 7	818025	AT2G34600	no
895	AT2G24240	BTB/POZ domain with WD40/YVTN repeat-like protein	816958	AT2G24240	no
896	AT3G24463	nuclear transport factor 2 family protein	28719312	AT3G24463	no
897	PRA1.B6	prenylated RAB acceptor 1.B6	830602	AT5G07110	no
898	AT4G17680	SBP (S-ribonuclease binding protein) family protein	827488	AT4G17680	no
899	SOS4	pfkB-like carbohydrate kinase family protein	833763	AT5G37850	no
900	AT1G17340	Phosphoinositide phosphatase family protein	838305	AT1G17340	no
901	AT1G56120	Leucine-rich repeat transmembrane protein kinase	842064	AT1G56120	no
902	AT3G12970	serine/arginine repetitive matrix-like protein	820483	AT3G12970	no
903	AT1G12380	hypothetical protein	837793	AT1G12380	no
904	AT3G57750	Protein kinase superfamily protein	824944	AT3G57750	no
905	ARF1	auxin response factor 1	842268	AT1G59750	no
906	CLE43	CLAVATA3/ESR-RELATED 43	28717267	AT1G25425	no
907	APK3	adenosine-5'-phosphosulfate (APS) kinase 3	821077	AT3G03900	no
908	BRD4	bromodomain 4	2745841	AT1G61215	no
909	AT4G01700	Chitinase family protein	828131	AT4G01700	no
910	WOX13	WUSCHEL related homeobox 13	829707	AT4G35550	no
911	AT2G22650	FAD-dependent oxidoreductase family protein	816796	AT2G22650	no
912	LHW	transcription factor-like protein	817265	AT2G27230	no
913	A/N-InvC	Plant neutral invertase family protein	819828	AT3G06500	no
914	MAKR5	membrane-associated kinase regulator	835364	AT5G52870	no
915	ENP	Phototropic-responsive NPH3 family protein	829311	AT4G31820	no
916	CLE41	CLAVATA3/ESR-RELATED 41	822075	AT3G24770	no
917	TIP2	tonoplast intrinsic protein 2	822259	AT3G26520	no
918	AT4G37830	cytochrome c oxidase-like protein	829939	AT4G37830	no
919	MPK20	MAP kinase 20	818888	AT2G42880	no
920	AT5G42860	late embryogenesis abundant protein: group 2	834297	AT5G42860	no
921	ABCI21	P-loop containing nucleoside triphosphate hydrolases superfamily protein	834434	AT5G44110	no
922	ANK1	ankyrin-like1	831855	AT5G02620	no
923	4CL2	AMP-dependent synthetase and ligase family protein	836457	AT5G63380	peroxisomes
924	NET1D	kinase interacting (KIP1-like) family protein	838350	AT1G03080	no
925	LUL1	RING/U-box superfamily protein	831908	AT5G03200	no
926	RHD1	NAD(P)-binding Rossmann-fold superfamily protein	842752	AT1G64440	no
927	AT5G39080	HXXXD-type acyl-transferase family protein	833900	AT5G39080	no
928	2023-10-03	organic cation/carnitine transporter 3	838209	AT1G16390	no
929	AT3G52870	IQ calmodulin-binding motif family protein	824453	AT3G52870	no
930	AT1G02180	ferredoxin-like protein	839543	AT1G02180	no
931	MBD11	methyl-CPG-binding domain 11	820822	AT3G15790	no
932	AT5G18550	Zinc finger C-x8-C-x5-C-x3-H type family protein	831973	AT5G18550	no
933	AT5G55840	PPR superfamily protein	835678	AT5G55840	no
934	AT4G34730	ribosome-binding factor A family protein	829625	AT4G34730	no
935	MYB3	myb domain protein 3	838870	AT1G22640	no
936	DGAT2	diacylglycerol acyltransferase family	824315	AT3G51520	no
937	AT4G15765	FAD/NAD(P)-binding oxidoreductase family protein	827256	AT4G15765	no
938	AAP1	amino acid permease 1	842205	AT1G58360	no
939	AT3G09800	SNARE-like superfamily protein	820138	AT3G09800	no
940	HYD1	C-8:7 sterol isomerase	838593	AT1G20050	no
941	AT1G24330	ARM repeat superfamily protein	839049	AT1G24330	no
942	PP2-B10	phloem protein 2-B10	814767	AT2G02360	no
943	AT1G69210	Uncharacterized protein family UPF0090	843252	AT1G69210	no
944	NIT3	nitrilase 3	823557	AT3G44320	no
945	AT3G44798		6240664	AT3G44798	no
946	AT2G37670	Transducin/WD40 repeat-like superfamily protein	818344	AT2G37670	no
947	SSL2	strictosidine synthase-like 2	818728	AT2G41290	no
948	AT5G40100	Disease resistance protein (TIR-NBS-LRR class) family	834007	AT5G40100	no
949	HA7	H[+]-ATPase 7	825204	AT3G60330	no
950	FLA1	FASCICLIN-like arabinogalactan 1	835667	AT5G55730	no
951	AT1G16670	Protein kinase superfamily protein	838236	AT1G16670	no
952	SBTI1.1	subtilase family protein	839318	AT1G01900	no
953	AT5G56380	F-box/RNI-like/FBD-like domains-containing protein	835739	AT5G56380	no
954	TI1	trypsin inhibitor protein 1	818952	AT2G43510	no
955	AT1G75460	ATP-dependent protease La (LON) domain protein	843882	AT1G75460	no
956	AT5G06700	trichome birefringence-like protein (DUF828)	830559	AT5G06700	no
957	AT4G01920	Cysteine/Histidine-rich C1 domain family protein	828197	AT4G01920	no
958	GCL2	GCR2-like 2	816606	AT2G20770	no
959	ADF8	actin depolymerizing factor 8	828037	AT4G00680	no
960	SERAT2;2	serine acetyltransferase 2;2	820499	AT3G13110	no
961	AT3G16800	Protein phosphatase 2C family protein	820933	AT3G16800	no
962	AT2G27310	F-box family protein	817274	AT2G27310	no
963	AT1G68620	alpha/beta-Hydrolases superfamily protein	843192	AT1G68620	no
964	AT2G05830	NagB/RpiA/CoA transferase-like superfamily protein	815134	AT2G05830	no
965	AT5G14690	transmembrane protein	831321	AT5G14690	no
966	AT3G09310	membrane protein insertion efficiency factor	820087	AT3G09310	no
967	AT4G36640	Sec14p-like phosphatidylinositol transfer family protein	829816	AT4G36640	no
968	AT1G05870	hypothetical protein (DUF1685)	837097	AT1G05870	no
969	AT2G46540	fiber	819266	AT2G46540	no
970	AT1G61590	Protein kinase superfamily protein	842455	AT1G61590	no
971	AT3G48460	GDSL-like Lipase/Acylhydrolase superfamily protein	824005	AT3G48460	no
972	AT5G58340	myb-like HTH transcriptional regulator family protein	835946	AT5G58340	no
973	PG1	polygalacturonase 1	842334	AT1G60390	no
974	FAF3	FANTASTIC four-like protein (DUF3049)	832046	AT5G19260	no
975	AT2G28410	transmembrane protein	817389	AT2G28410	no
976	AT1G14580	C2H2-like zinc finger protein	838020	AT1G14580	no
977	AT3G59320	solute carrier family 35 protein (DUF914)	825101	AT3G59320	no
978	AT3G23510	Cyclopropane-fatty-acyl-phospholipid synthase	821931	AT3G23510	no
979	ACR1	ACT domain repeat 1	836718	AT5G65890	no
980	AT4G30450	glycine-rich protein	829168	AT4G30450	no
981	RCI3	Peroxidase superfamily protein	837028	AT1G05260	no
982	AT1G53790	F-box and associated interaction domains-containing protein	841816	AT1G53790	no
983	TPS10	terpene synthase 10	816955	AT2G24210	no
984	GH9C2	glycosyl hydrolase 9C2	842747	AT1G64390	no
985	AT2G41810	imidazolonepropionase (Protein of unknown function: DUF642)	818780	AT2G41810	no
986	SRF7	STRUBBELIG-receptor family 7	820655	AT3G14350	no
987	AT5G15190	hypothetical protein	831371	AT5G15190	no
988	AT3G19470	F-box and associated interaction domains-containing protein	821481	AT3G19470	no
989	AT5G13210	Uncharacterized conserved protein UCP015417: vWA	831161	AT5G13210	no
990	AT1G55210	Disease resistance-responsive (dirigent-like protein) family protein	841964	AT1G55210	no
991	AIR9	Outer arm dynein light chain 1 protein	818033	AT2G34680	no
992	AT1G20130	GDSL-like Lipase/Acylhydrolase superfamily protein	838602	AT1G20130	no
993	MPL1	Myzus persicae-induced lipase 1	831268	AT5G14180	no
994	FAMT	farnesoic acid carboxyl-O-methyltransferase	823620	AT3G44860	no
995	AT3G46490	2-oxoglutarate (2OG) and Fe(II)-dependent oxygenase superfamily protein	823802	AT3G46490	no
996	AT3G14067	Subtilase family protein	820621	AT3G14067	no
997	AT1G75290	NAD(P)-binding Rossmann-fold superfamily protein	843866	AT1G75290	no
998	AT3G50300	HXXXD-type acyl-transferase family protein	824192	AT3G50300	no
999	AT1G27435	hypothetical protein	839634	AT1G27435	no
1000	AT3G55350	PIF / Ping-Pong family of plant transposase	824701	AT3G55350	no
1001	PLAT1	Lipase/lipooxygenase: PLAT/LH2 family protein	830128	AT4G39730	no
1002	ERF13	ethylene-responsive element binding factor 13	819093	AT2G44840	no
1003	TBL38	TRICHOME BIREFRINGENCE-LIKE 38	839779	AT1G29050	no
1004	ROPGEF12	RHO guanyl-nucleotide exchange factor 12	844325	AT1G79860	no
1005	AT3G47560	alpha/beta-Hydrolases superfamily protein	823910	AT3G47560	no
1006	RPA	root and pollen arfgap	818088	AT2G35210	no
1007	AT2G36360	Galactose oxidase/kelch repeat superfamily protein	818209	AT2G36360	no
1008	AT3G63510	FMN-linked oxidoreductases superfamily protein	825526	AT3G63510	no
1009	GlcNAc1pUT2	N-acetylglucosamine-1-phosphate uridylyltransferase 2	818066	AT2G35020	no
1010	AT1G10140	Uncharacterized conserved protein UCP031279	837551	AT1G10140	no
1011	AT2G04790	PTB domain engulfment adapter	815022	AT2G04790	no
1012	PIF4	phytochrome interacting factor 4	818903	AT2G43010	no
1013	AT5G06630	proline-rich extensin-like family protein	830551	AT5G06630	no
1014	HAT14	homeobox leucine zipper protein	830560	AT5G06710	no
1015	AT3G50270	HXXXD-type acyl-transferase family protein	824189	AT3G50270	no
1016	2023-04-01	APS reductase 1	825793	AT4G04610	no
1017	HK5	histidine kinase 5	830938	AT5G10720	no
1018	ABF3	abscisic acid responsive elements-binding factor 3	829547	AT4G34000	no
1019	AT4G17800	Putative AT-hook DNA-binding family protein	827502	AT4G17800	no
1020	AT1G52100	Mannose-binding lectin superfamily protein	841640	AT1G52100	no
1021	AT1G55260	Bifunctional inhibitor/lipid-transfer protein/seed storage 2S albumin superfamily protein	841970	AT1G55260	no
1022	AT1G19450	Major facilitator superfamily protein	838529	AT1G19450	no
1023	AT3G13910	hypothetical protein (DUF3511)	820604	AT3G13910	no
1024	TRP1	tryptophan biosynthesis 1	831666	AT5G17990	no
1025	AT1G27670	transmembrane protein	839659	AT1G27670	no
1026	ALDH10A8	aldehyde dehydrogenase 10A8	843831	AT1G74920	no
1027	KING1	SNF1-related protein kinase regulatory subunit gamma 1	824012	AT3G48530	no
1028	BIA1	HXXXD-type acyl-transferase family protein	827208	AT4G15400	no
1029	RBOH F	respiratory burst oxidase protein F	842710	AT1G64060	no
1030	DIN9	Mannose-6-phosphate isomerase: type I	843027	AT1G67070	no
1031	DR4	drought-repressed 4	843668	AT1G73330	no
1032	AOC2	allene oxide cyclase 2	822168	AT3G25770	no
1033	BGLU1	Glycosyl hydrolase superfamily protein	841088	AT1G45191	no
1034	XF1	FAD/NAD(P)-binding oxidoreductase family protein	842213	AT1G58440	no
1035	SCA3	DNA/RNA polymerases superfamily protein	816946	AT2G24120	no
1036	AT1G73170	P-loop containing nucleoside triphosphate hydrolases superfamily protein	843649	AT1G73170	no
1037	ADK1	dual specificity kinase 1	839368	AT1G03930	no
1038	BGLU40	beta glucosidase 40	839196	AT1G26560	no
1039	AT1G58400	Disease resistance protein (CC-NBS-LRR class) family	842209	AT1G58400	no
1040	AT3G46845	hypothetical protein	28719386	AT3G46845	no
1041	UMAMIT36	nodulin MtN21 /EamA-like transporter family protein	843362	AT1G70260	no
1042	RAP2.11	related to AP2 11	832099	AT5G19790	no
1043	AT5G36160	Tyrosine transaminase family protein	833613	AT5G36160	no
1044	NPG1	tetratricopeptide repeat (TPR)-containing protein	818906	AT2G43040	no
1045	HAOX2	Aldolase-type TIM barrel family protein	820632	AT3G14150	peroxisomes
1046	CER1	Fatty acid hydroxylase superfamily	837602	AT1G02205	no
1047	AT3G56160	Sodium Bile acid symporter family	824782	AT3G56160	no
1048	APS3	Pseudouridine synthase/archaeosine transglycosylase-like family protein	827118	AT4G14680	no
1049	AT4G33660	cysteine-rich TM module stress tolerance protein	829507	AT4G33660	no
1050	AT5G06845		28720842	AT5G06845	no
1051	MGP2	MALE GAMETOPHYTE DEFECTIVE 2	837388	AT1G08660	no
1052	AT5G10830	S-adenosyl-L-methionine-dependent methyltransferases superfamily protein	830950	AT5G10830	no
1053	BLH1	BEL1-like homeodomain 1	818167	AT2G35940	no
1054	MYB76	myb domain protein 76	830663	AT5G07700	no
1055	PEPR1	PEP1 receptor 1	843639	AT1G73080	no
1056	CLE2	CLAVATA3/ESR-related 2	827583	AT4G18510	no
1057	AT4G29610	Cytidine/deoxycytidylate deaminase family protein	829082	AT4G29610	no
1058	AT1G23120	Polyketide cyclase/dehydrase and lipid transport superfamily protein	838920	AT1G23120	no
1059	SR1	serine/threonine protein kinase 1	831765	AT5G01820	no
1060	AT4G11300	ROH1: putative (DUF793)	826732	AT4G11300	no
1061	AT5G22580	Stress responsive A/B Barrel Domain-containing protein	832321	AT5G22580	no
1062	AT1G14130	2-oxoglutarate (2OG) and Fe(II)-dependent oxygenase superfamily protein	837972	AT1G14130	no
1063	AT2G07774	hypothetical protein	815361	AT2G07774	no
1064	PMEPCRA	methylesterase PCR A	837701	AT1G11580	no
1065	MTSSB	mitochondrially targeted single-stranded DNA binding protein	826707	AT4G11060	no
1066	BZIP24	basic leucine zipper 24	824359	AT3G51960	no
1067	AT4G22580	Exostosin family protein	828354	AT4G22580	no
1068	CYP87A2	cytochrome P450: family 87: subfamily A: polypeptide 2	837830	AT1G12740	no
1069	AT2G26380	Leucine-rich repeat (LRR) family protein	817178	AT2G26380	no
1070	SFGH	S-formylglutathione hydrolase	818751	AT2G41530	no
1071	AT2G18630	transmembrane protein: putative (DUF677)	816378	AT2G18630	no
1072	CESA1	cellulose synthase 1	829376	AT4G32410	no
1073	AT5G37790	Protein kinase superfamily protein	833757	AT5G37790	no
1074	GH9B5	glycosyl hydrolase 9B5	838583	AT1G19940	no
1075	MYBC1	Homeodomain-like superfamily protein	818697	AT2G40970	no
1076	AT5G55790	hypothetical protein	835673	AT5G55790	no
1077	HMT-1	Homocysteine S-methyltransferase family protein	822186	AT3G25900	no
1078	AT1G78060	Glycosyl hydrolase family protein	844141	AT1G78060	no
1079	CLF	SET domain-containing protein	816870	AT2G23380	no
1080	AT1G33260	Protein kinase superfamily protein	840220	AT1G33260	no
1081	AT5G43570	Serine protease inhibitor: potato inhibitor I-type family protein	834377	AT5G43570	no
1082	XTH12	xyloglucan endotransglucosylase/hydrolase 12	835857	AT5G57530	no
1083	AT4G11290	Peroxidase superfamily protein	826731	AT4G11290	no
1084	UGT85A2	UDP-glucosyl transferase 85A2	838843	AT1G22360	no
1085	CDPK9	calmodulin-like domain protein kinase 9	832424	AT5G23580	no
1086	AT2G33250	transmembrane protein	817887	AT2G33250	no
1087	AT2G34010	verprolin	817962	AT2G34010	no
1088	AT1G57600	MBOAT (membrane bound O-acyl transferase) family protein	842136	AT1G57600	no
1089	CPSF73-II	cleavage and polyadenylation specificity factor 73 kDa subunit-II	814702	AT2G01730	no
1090	AT5G13260	myosin	831167	AT5G13260	no
1091	AT4G10060	Beta-glucosidase: GBA2 type family protein	826597	AT4G10060	no
1092	AT5G07870	HXXXD-type acyl-transferase family protein	830680	AT5G07870	no
1093	AT1G10690	cyclin-dependent kinase inhibitor	837612	AT1G10690	no
1094	AT5G56890	Protein kinase superfamily protein	835791	AT5G56890	no
1095	AT5G22620	phosphoglycerate/bisphosphoglycerate mutase family protein	832325	AT5G22620	no
1096	AT1G16850	transmembrane protein	838256	AT1G16850	no
1097	AT3G00650		28718413	AT3G00650	no
1098	PSAT1	phospholipid sterol acyl transferase 1	839335	AT1G04010	no
1099	AT3G44510	alpha/beta-Hydrolases superfamily protein	823576	AT3G44510	no
1100	RABG3d	RAB GTPase homolog G3D	841658	AT1G52280	no
1101	AT3G15940	UDP-Glycosyltransferase superfamily protein	820838	AT3G15940	no
1102	MYB95	myb domain protein 95	843784	AT1G74430	no
1103	AT5G44660	hypothetical protein	834495	AT5G44660	no
1104	AT5G02890	HXXXD-type acyl-transferase family protein	831751	AT5G02890	no
1105	AT5G35740	Carbohydrate-binding X8 domain superfamily protein	833551	AT5G35740	no
1106	AT1G73750	alpha/beta hydrolase family protein	843710	AT1G73750	no
1107	AT3G51750	hypothetical protein	824338	AT3G51750	no
1108	AT3G60490	Integrase-type DNA-binding superfamily protein	825220	AT3G60490	no
1109	AT4G28360	Ribosomal protein L22p/L17e family protein	828951	AT4G28360	no
1110	AT5G53070	Ribosomal protein L9/RNase H1	835387	AT5G53070	no
1111	AT1G51430	cTAGE family protein	841568	AT1G51430	no
1112	AT1G67000	Protein kinase superfamily protein	843018	AT1G67000	no
1113	PRX52	Peroxidase superfamily protein	830416	AT5G05340	no
1114	JAL33	Mannose-binding lectin superfamily protein	820893	AT3G16450	no
1115	RABC2A	RAB GTPase homolog C2A	831810	AT5G03530	no
1116	AT5G56850	hypothetical protein	835787	AT5G56850	no
1117	ABCG30	pleiotropic drug resistance 2	827187	AT4G15230	no
1118	AT3G54880	zinc finger protein	824653	AT3G54880	no
1119	HPL1	hydroperoxide lyase 1	827215	AT4G15440	no
1120	4CL3	4-coumarate:CoA ligase 3	842814	AT1G65060	no
1121	AT1G66760	MATE efflux family protein	842994	AT1G66760	no
1122	RHS12	root hair specific 12	820240	AT3G10710	no
1123	AT1G52000	Mannose-binding lectin superfamily protein	841629	AT1G52000	no
1124	AT3G05000	Transport protein particle (TRAPP) component	819661	AT3G05000	no
1125	RHS16	root hair specific 16	829039	AT4G29180	no
1126	AT5G03140	Concanavalin A-like lectin protein kinase family protein	831590	AT5G03140	no
1127	USP	UDP-sugar pyrophosphorylase	835333	AT5G52560	no
1128	AOC1	allene oxide cyclase 1	822167	AT3G25760	no
1129	AT5G45490	P-loop containing nucleoside triphosphate hydrolases superfamily protein	834585	AT5G45490	no
1130	AT3G27610	Nucleotidylyl transferase superfamily protein	822383	AT3G27610	no
1131	AT1G67365		5007838	AT1G67365	no
1132	FLA17	FASCICLIN-like arabinogalactan protein 17 precursor	830527	AT5G06390	no
1133	AT1G32120	serine/threonine-protein phosphatase 7 long form-like protein	840104	AT1G32120	no
1134	SR34b	RNA-binding (RRM/RBD/RNP motifs) family protein	828027	AT4G02430	no
1135	AT1G16350	Aldolase-type TIM barrel family protein	838204	AT1G16350	no
1136	AT3G56230	BTB/POZ domain-containing protein	824789	AT3G56230	no
1137	MGD1	monogalactosyl diacylglycerol synthase 1	829306	AT4G31780	no
1138	AT1G54050	HSP20-like chaperones superfamily protein	841843	AT1G54050	no
1139	AT4G13860	RNA-binding (RRM/RBD/RNP motifs) family protein	827020	AT4G13860	no
1140	AT1G35320	transmembrane protein	840421	AT1G35320	no
1141	AT1G56045	Ribosomal protein L41 family	2745833	AT1G56045	no
1142	PROPEP6	elicitor peptide 6 precursor	816736	AT2G22000	no
1143	AT2G22620	Rhamnogalacturonate lyase family protein	816793	AT2G22620	no
1144	HPA1	histidinol phosphate aminotransferase 1	830897	AT5G10330	no
1145	GPP1	glycerol-3-phosphatase 1	828690	AT4G25840	no
1146	AT1G78560	Sodium Bile acid symporter family	844192	AT1G78560	no
1147	AT3G56760	Protein kinase superfamily protein	824843	AT3G56760	no
1148	GLR3.5	glutamate receptor 3.5	817800	AT2G32390	no
1149	AT5G48412		10723095	AT5G48412	no
1150	AT2G44640	TRIGALACTOSYLDIACYLGLYCEROL-like protein	819072	AT2G44640	no
1151	ZIF1	zinc induced facilitator 1	831219	AT5G13740	no
1152	AT4G35840	RING/U-box superfamily protein	829738	AT4G35840	no
1153	ASB1	anthranilate synthase beta subunit 1	839103	AT1G25220	no
1154	AT1G31850	S-adenosyl-L-methionine-dependent methyltransferases superfamily protein	840075	AT1G31850	no
1155	AT2G36090	F-box family protein	818182	AT2G36090	no
1156	AT1G19960	transcription factor	838585	AT1G19960	no
1157	AT2G18210	hypothetical protein	816336	AT2G18210	no
1158	AT3G15115	serine/arginine repetitive matrix protein	820742	AT3G15115	no
1159	AT5G51630	Disease resistance protein (TIR-NBS-LRR class) family	835237	AT5G51630	no
1160	SK2	shikimate kinase 2	830108	AT4G39540	no
1161	JAZ1	jasmonate-zim-domain protein 1	838501	AT1G19180	no
1162	MYB20	myb domain protein 20	842938	AT1G66230	no
1163	AT2G22760	basic helix-loop-helix (bHLH) DNA-binding superfamily protein	816806	AT2G22760	no
1164	AT5G50370	Adenylate kinase family protein	835104	AT5G50370	no
1165	NUDX13	nudix hydrolase homolog 13	822281	AT3G26690	no
1166	AT4G37190	plasma membrane: autoregulation-binding site: misato segment II: myosin-like: tubulin/FtsZ protein	829873	AT4G37190	no
1167	AT3G07320	O-Glycosyl hydrolases family 17 protein	819920	AT3G07320	no
1168	AT1G62330	O-fucosyltransferase family protein	842531	AT1G62330	no
1169	AT2G02765	L-aminoadipate-semialdehyde dehydrogenase-phosphopantetheinyl transferase	814806	AT2G02765	no
1170	JAZ6	jasmonate-zim-domain protein 6	843577	AT1G72450	no
1171	MAKR2	membrane-associated kinase regulator	842712	AT1G64080	no
1172	AT2G43500	Plant regulator RWP-RK family protein	818951	AT2G43500	no
1173	AT1G28570	SGNH hydrolase-type esterase superfamily protein	839757	AT1G28570	no
1174	NUDT11	nudix hydrolase homolog 11	834634	AT5G45940	peroxisomes
1175	HB-7	homeobox-7	834733	AT5G46880	no
1176	CYP81D1	cytochrome p450 81d1	833619	AT5G36220	no
1177	DYW1	Pentatricopeptide repeat (PPR) superfamily protein	841167	AT1G47580	no
1178	PIP2B	plasma membrane intrinsic protein 2	818293	AT2G37170	no
1179	AT1G20030	Pathogenesis-related thaumatin superfamily protein	838592	AT1G20030	no
1180	AT1G65180	Cysteine/Histidine-rich C1 domain family protein	842825	AT1G65180	no
1181	FZL	FZO-like protein	839566	AT1G03160	no
1182	APX1	ascorbate peroxidase 1	837304	AT1G07890	no
1183	CYP705A30	cytochrome P450: family 705: subfamily A: polypeptide 30	821644	AT3G20940	no
1184	AT1G78260	RNA-binding (RRM/RBD/RNP motifs) family protein	844161	AT1G78260	no
1185	AT2G32150	Haloacid dehalogenase-like hydrolase (HAD) superfamily protein	817774	AT2G32150	no
1186	AT1G66540	Cytochrome P450 superfamily protein	842972	AT1G66540	no
1187	ATCSLA15	Nucleotide-diphospho-sugar transferases superfamily protein	826972	AT4G13410	no
1188	ACH2	acyl-CoA thioesterase II	839254	AT1G01710	peroxisomes
1189	UGT78D1	UDP-glucosyl transferase 78D1	839933	AT1G30530	no
1190	AT4G30060	Core-2/I-branching beta-1:6-N-acetylglucosaminyltransferase family protein	829129	AT4G30060	no
1191	AT5G59050	G patch domain protein	836022	AT5G59050	no
1192	AT5G40540	Protein kinase superfamily protein	834052	AT5G40540	no
1193	AT3G44160	Outer membrane OMP85 family protein	823537	AT3G44160	no
1194	SOL1	carboxypeptidase D	843499	AT1G71696	no
1195	IBR10	indole-3-butyric acid response 10	827088	AT4G14430	peroxisomes
1196	BGAL8	beta-galactosidase 8	817395	AT2G28470	no
1197	AT2G36885	translation initiation factor	818261	AT2G36885	no
1198	AT4G24340	Phosphorylase superfamily protein	828537	AT4G24340	no
1199	AT5G01800	saposin B domain-containing protein	831924	AT5G01800	no
1200	AT5G04830	Nuclear transport factor 2 (NTF2) family protein	830362	AT5G04830	no
1201	AT1G17830	hypothetical protein (DUF789)	838361	AT1G17830	no
1202	AT5G02450	Ribosomal protein L36e family protein	831907	AT5G02450	no
1203	AT3G06868	vitellogenin-like protein	6241205	AT3G06868	no
1204	AAE14	acyl-activating enzyme 14	839932	AT1G30520	peroxisomes
1205	MES9	methyl esterase 9	829869	AT4G37150	no
1206	AT2G31490	neuronal acetylcholine receptor subunit alpha-5	817707	AT2G31490	no
1207	AT5G40080	Mitochondrial ribosomal protein L27	834005	AT5G40080	no
1208	CYP81K1	cytochrome P450: family 81: subfamily K: polypeptide 1	830926	AT5G10610	no
1209	OEP7	outer envelope membrane protein 7	824407	AT3G52420	no
1210	AT3G09410	Pectinacetylesterase family protein	820100	AT3G09410	no
1211	ARR15	response regulator 15	843828	AT1G74890	no
1212	AT4G28300	formin-like protein (DUF1421)	828945	AT4G28300	no
1213	APL1	ADP glucose pyrophosphorylase large subunit 1	832042	AT5G19220	no
1214	RUS2	root UVB sensitive protein (Protein of unknown function: DUF647)	817675	AT2G31190	no
1215	AT3G05990	Leucine-rich repeat (LRR) family protein	819770	AT3G05990	no
1216	SOBER1	carboxylesterase	828325	AT4G22300	no
1217	AT4G06534	transmembrane protein	826005	AT4G06534	no
1218	AT5G63350	von willebrand factor A domain protein	836455	AT5G63350	no
1219	HIPP20	Heavy metal transport/detoxification superfamily protein	843445	AT1G71050	no
1220	BIO1	adenosylmethionine-8-amino-7-oxononanoate transaminase	835863	AT5G57590	no
1221	AT5G24990	enhanced disease resistance-like protein (DUF1336)	832569	AT5G24990	no
1222	JAZ4	jasmonate-zim-domain protein 4	841271	AT1G48500	no
1223	AT2G33180	hypothetical protein	817879	AT2G33180	no
1224	AT2G25530	AFG1-like ATPase family protein	817091	AT2G25530	no
1225	AT5G28237	Pyridoxal-5'-phosphate-dependent enzyme family protein	2746023	AT5G28237	no
1226	AT1G30910	Molybdenum cofactor sulfurase family protein	839975	AT1G30910	no
1227	AT3G07070	Protein kinase superfamily protein	819893	AT3G07070	no
1228	AT5G05820	Nucleotide-sugar transporter family protein	830467	AT5G05820	no
1229	SAC8	SAC domain-containing protein 8	824346	AT3G51830	no
1230	AT3G13040	myb-like HTH transcriptional regulator family protein	820490	AT3G13040	no
1231	MPK19	MAP kinase 19	820700	AT3G14720	no
1232	AT5G56840	myb-like transcription factor family protein	835786	AT5G56840	no
1233	AT2G34910	root hair specific protein	818056	AT2G34910	no
1234	AT2G35450	catalytic/ hydrolase	818110	AT2G35450	no
1235	AT1G05170	Galactosyltransferase family protein	839292	AT1G05170	no
1236	PME61	pectin methylesterase 61	825070	AT3G59010	no
1237	TOP6B	topoisomerase 6 subunit B	821626	AT3G20780	no
1238	AT3G25410	Sodium Bile acid symporter family	822125	AT3G25410	no
1239	MAPKKK14	mitogen-activated protein kinase kinase kinase 14	817555	AT2G30040	no
1240	AT1G13390	translocase subunit seca	837899	AT1G13390	no
1241	AT2G41970	Protein kinase superfamily protein	818797	AT2G41970	no
1242	AT4G22212	defensin-like protein	828313	AT4G22212	no
1243	LTI78	low-temperature-responsive protein 78 (LTI78) / desiccation-responsive protein 29A (RD29A)	835307	AT5G52310	no
1244	KEA3	K+ efflux antiporter 3	825822	AT4G04850	no
1245	AT1G08390	recQ-mediated instability-like protein	837359	AT1G08390	no
1246	AT5G16340	AMP-dependent synthetase and ligase family protein	831495	AT5G16340	no
1247	AT4G37700	hypothetical protein	829925	AT4G37700	no
1248	AT3G54910	RNI-like superfamily protein	824656	AT3G54910	no
1249	RHM1	rhamnose biosynthesis 1	844193	AT1G78570	no
1250	AT1G21590	kinase with adenine nucleotide alpha hydrolases-like domain-containing protein	838760	AT1G21590	no
1251	AT3G50620	P-loop containing nucleoside triphosphate hydrolases superfamily protein	824225	AT3G50620	no
1252	AT4G31110	Wall-associated kinase family protein	829238	AT4G31110	no
1253	STY46	ACT-like protein tyrosine kinase family protein	830003	AT4G38470	no
1254	PME2	pectin methylesterase 2	841820	AT1G53830	no
1255	PPa4	pyrophosphorylase 4	824530	AT3G53620	no
1256	PLC4	phosphatidylinositol-speciwc phospholipase C4	835984	AT5G58700	no
1257	PRT1	proteolysis 1	822078	AT3G24800	no
1258	CLA1	Deoxyxylulose-5-phosphate synthase	827230	AT4G15560	no
1259	RS2Z33	arginine/serine-rich zinc knuckle-containing protein 33	818311	AT2G37340	no
1260	MES3	methyl esterase 3	816893	AT2G23610	no
1261	WIP3	WPP domain interacting protein 3	820536	AT3G13360	no
1262	ABAP1	ARMADILLO BTB protein 1	831145	AT5G13060	no
1263	AT4G03635	F-box/LRR protein	5008119	AT4G03635	no
1264	AT1G21440	Phosphoenolpyruvate carboxylase family protein	838742	AT1G21440	no
1265	CP12-3	CP12 domain-containing protein 3	843989	AT1G76560	no
1266	FSD1	Fe superoxide dismutase 1	828613	AT4G25100	no
1267	AT2G14878		10723065	AT2G14878	no
1268	AT1G76380	DNA-binding bromodomain-containing protein	843970	AT1G76380	no
1269	AT5G16810	Protein kinase superfamily protein	831544	AT5G16810	no
1270	AT3G29130	kxDL motif protein	822561	AT3G29130	no
1271	AT1G34220	Regulator of Vps4 activity in the MVB pathway protein	840321	AT1G34220	no
1272	LTP2	lipid transfer protein 2	818435	AT2G38530	no
1273	emb2191	Cytidine/deoxycytidylate deaminase family protein	841237	AT1G48175	no
1274	AT5G12950	proline-tRNA ligase (DUF1680)	831135	AT5G12950	no
1275	PAP1	production of anthocyanin pigment 1	842120	AT1G56650	no
1276	AT5G15320	ATP synthase E chain	831384	AT5G15320	no
1277	AT5G22700	LOW protein: F-box/FBD/LRR-like protein	832335	AT5G22700	no
1278	EULS3	hydroxyproline-rich glycoprotein family protein	818491	AT2G39050	no
1279	SS2	starch synthase 2	820294	AT3G01180	no
1280	IIL1	isopropyl malate isomerase large subunit 1	826975	AT4G13430	no
1281	NF-YA4	nuclear factor Y: subunit A4	818037	AT2G34720	no
1282	ABIL4	ABL interactor-like protein 4	834208	AT5G42030	no
1283	MSL10	mechanosensitive channel of small conductance-like 10	831081	AT5G12080	no
1284	4CL1	4-coumarate:CoA ligase 1	841593	AT1G51680	no
1285	AT1G68470	Exostosin family protein	843176	AT1G68470	no
1286	IQD26	IQ-domain 26	820897	AT3G16490	no
1287	AT4G15990	hypothetical protein	827283	AT4G15990	no
1288	AT4G16140	proline-rich family protein	827300	AT4G16140	no
1289	RR3	response regulator 3	818730	AT2G41310	no
1290	ATS3	embryo-specific protein 3	830610	AT5G07190	no
1291	AT4G27700	Rhodanese/Cell cycle control phosphatase superfamily protein	828884	AT4G27700	no
1292	AT5G03110	protamine P1 family protein	831797	AT5G03110	no
1293	RGLG4	Ca(2)-dependent phospholipid-binding protein (Copine) family	844276	AT1G79380	no
1294	AT1G18490	2-aminoethanethiol dioxygenase: putative (DUF1637)	838430	AT1G18490	no
1295	AT5G02575		28720481	AT5G02575	no
1296	JAL22	jacalin-related lectin 22	818516	AT2G39310	no
1297	AT4G29560	fanconi anemia group E protein FANCE protein	829077	AT4G29560	no
1298	AT4G01593		5008112	AT4G01593	no
1299	AT1G08347		28716822	AT1G08347	no
1300	AT3G57320	threonine-tRNA ligase 2	824899	AT3G57320	no
1301	AT1G19650	Sec14p-like phosphatidylinositol transfer family protein	838552	AT1G19650	no
1302	AK-HSDH I	aspartate kinase-homoserine dehydrogenase i	840011	AT1G31230	no
1303	AT1G06550	ATP-dependent caseinolytic (Clp) protease/crotonase family protein	837166	AT1G06550	no
1304	NodGS	nodulin/glutamine synthase-like protein	824484	AT3G53180	no
1305	AT3G20370	TRAF-like family protein	821582	AT3G20370	no
1306	AT1G79075		5007857	AT1G79075	no
1307	EMB2799	NAD(P)-binding Rossmann-fold superfamily protein	818494	AT2G39080	no
1308	AT3G03980	NAD(P)-binding Rossmann-fold superfamily protein	819553	AT3G03980	no
1309	ATSK12	Protein kinase superfamily protein	819753	AT3G05840	no
1310	AT1G15175		5007696	AT1G15175	no
1311	AT2G33255	Haloacid dehalogenase-like hydrolase (HAD) superfamily protein	817888	AT2G33255	no
1312	AT5G10410	ENTH/ANTH/VHS superfamily protein	830905	AT5G10410	no
1313	HCT	hydroxycinnamoyl-CoA shikimate/quinate hydroxycinnamoyl transferase	834951	AT5G48930	no
1314	EXO70H8	exocyst subunit exo70 family protein H8	817414	AT2G28650	no
1315	OEP16-3	Mitochondrial import inner membrane translocase subunit Tim17/Tim22/Tim23 family protein	818821	AT2G42210	no
1316	CPK2	calmodulin-domain protein kinase cdpk	820235	AT3G10660	no
1317	MDHAR	monodehydroascorbate reductase	820155	AT3G09940	peroxisomes
1318	AT1G02460	Pectin lyase-like superfamily protein	839443	AT1G02460	no
1319	AT5G08600	U3 ribonucleoprotein (Utp) family protein	830761	AT5G08600	no
1320	Fh5	formin homology5	835554	AT5G54650	no
1321	AtIPCS3	Inositol phosphorylceramide synthase 3	817501	AT2G29525	no
1322	AT1G52720	hypothetical protein	841705	AT1G52720	no
1323	EICBP.B	ethylene induced calmodulin binding protein	830800	AT5G09410	no
1324	AT4G14548		6240426	AT4G14548	no
1325	UGT74F1	UDP-glycosyltransferase 74 F1	818988	AT2G43840	no
1326	LOX5	PLAT/LH2 domain-containing lipoxygenase family protein	821808	AT3G22400	no
1327	CYP83A1	cytochrome P450: family 83: subfamily A: polypeptide 1	827011	AT4G13770	no
1328	AT4G01910	Cysteine/Histidine-rich C1 domain family protein	827105	AT4G01910	no
1329	AT2G25460	EEIG1/EHBP1 protein amino-terminal domain protein	817084	AT2G25460	no
1330	CASP1	Uncharacterized protein family (UPF0497)	818183	AT2G36100	no
1331	AT4G04750	Major facilitator superfamily protein	825811	AT4G04750	no
1332	AT1G53250	histone-lysine N-methyltransferase: H3 lysine-79 specific-like protein	841758	AT1G53250	no
1333	AT2G40280	S-adenosyl-L-methionine-dependent methyltransferases superfamily protein	818620	AT2G40280	no
1334	AT4G22290	Ubiquitin-specific protease family C19-related protein	828324	AT4G22290	no
1335	RHL1	root hair initiation protein root hairless 1 (RHL1)	841258	AT1G48380	no
1336	AT1G62080	transmembrane protein	842504	AT1G62080	no
1337	AT1G65370	TRAF-like family protein	842848	AT1G65370	no
1338	AT2G43550	scorpion toxin-like knottin superfamily protein	818957	AT2G43550	no
1339	PTAC9	plastid transcriptionally active 9	827746	AT4G20010	no
1340	AT3G60440	Phosphoglycerate mutase family protein	825215	AT3G60440	no
1341	AT3G62070	hypothetical protein	825380	AT3G62070	no
1342	AT5G21280	hydroxyproline-rich glycoprotein family protein	832258	AT5G21280	no
1343	HB16	homeobox protein 16	830169	AT4G40060	no
1344	AT5G64980	transcription factor	836622	AT5G64980	no
1345	PHOT1	phototropin 1	823721	AT3G45780	no
1346	AT1G14970	O-fucosyltransferase family protein	838062	AT1G14970	no
1347	PBP1	PYK10-binding protein 1	820890	AT3G16420	no
1348	AT4G38370	Phosphoglycerate mutase family protein	829994	AT4G38370	no
1349	AT3G45680	Major facilitator superfamily protein	823710	AT3G45680	no
1350	AT1G53290	Galactosyltransferase family protein	841763	AT1G53290	no
1351	AT1G54020	GDSL-like Lipase/Acylhydrolase superfamily protein	841840	AT1G54020	no
1352	AT5G43870	auxin canalization protein (DUF828)	834409	AT5G43870	no
1353	AT4G28100	transmembrane protein	828926	AT4G28100	no
1354	MYB56	myb domain protein 56	831648	AT5G17800	no
1355	MSRB3	methionine sulfoxide reductase B3	825817	AT4G04800	no
1356	AT4G39780	Integrase-type DNA-binding superfamily protein	830136	AT4G39780	no
1357	FLA7	FASCICLIN-like arabinoogalactan 7	815021	AT2G04780	no
1358	AT2G05160	CCCH-type zinc fingerfamily protein with RNA-binding domain-containing protein	815064	AT2G05160	no
1359	AT5G45950	GDSL-like Lipase/Acylhydrolase superfamily protein	834635	AT5G45950	no
1360	UXS3	UDP-glucuronic acid decarboxylase 3	836047	AT5G59290	no
1361	UGT76E2	UDP-glucosyl transferase 76E2	836078	AT5G59590	no
1362	AT1G79160	filamentous hemagglutinin transporter	844257	AT1G79160	no
1363	HPR3	D-isomer specific 2-hydroxyacid dehydrogenase family protein	837811	AT1G12550	peroxisomes
1364	AT4G28150	hypothetical protein (DUF789)	828930	AT4G28150	no
1365	AT5G23330	Nucleotidylyl transferase superfamily protein	832397	AT5G23330	no
1366	AT4G14390	Ankyrin repeat family protein	827084	AT4G14390	no
1367	EXT13	proline-rich extensin-like family protein	833473	AT5G35190	no
1368	AtPOT1a	Nucleic acid-binding: OB-fold-like protein	815069	AT2G05210	no
1369	LARP6a	RNA-binding protein	834667	AT5G46250	no
1370	AT2G40435	transcription factor SCREAM-like protein	818637	AT2G40435	no
1371	AT1G13930	oleosin-B3-like protein	837953	AT1G13930	no
1372	AT1G28715		28717274	AT1G28715	no
1373	CSLC12	Cellulose-synthase-like C12	826301	AT4G07960	no
1374	TPS8	trehalose-6-phosphatase synthase S8	843365	AT1G70290	no
1375	SEC3B	exocyst complex component sec3B	841165	AT1G47560	no
1376	AT1G73530	RNA-binding (RRM/RBD/RNP motifs) family protein	843687	AT1G73530	no
1377	AT3G58640	Mitogen activated protein kinase kinase kinase-like protein	825033	AT3G58640	no
1378	AT4G33666	hypothetical protein	829508	AT4G33666	no
1379	CESA6	cellulose synthase 6	836595	AT5G64740	no
1380	AT4G29905	hypothetical protein	829113	AT4G29905	no
1381	AT2G21640	marker for oxidative stress response protein	816702	AT2G21640	no
1382	HYH	HY5-homolog	821027	AT3G17609	no
1383	RUP1	Transducin/WD40 repeat-like superfamily protein	835301	AT5G52250	no
1384	AT5G03320	Protein kinase superfamily protein	831876	AT5G03320	no
1385	AT2G14255	Ankyrin repeat family protein with DHHC zinc finger domain-containing protein	2745525	AT2G14255	no
1386	AT3G58875	hypothetical protein	28719414	AT3G58875	no
1387	TLP2	tubby like protein 2	816344	AT2G18280	no
1388	DAR7	DA1-related protein 7	836793	AT5G66610	no
1389	ADT4	arogenate dehydratase 4	823601	AT3G44720	no
1390	AT4G24480	Protein kinase superfamily protein	828550	AT4G24480	no
1391	AT3G57020	Calcium-dependent phosphotriesterase superfamily protein	824869	AT3G57020	no
1392	AT3G45310	Cysteine proteinases superfamily protein	823669	AT3G45310	no
1393	AT1G60010	D-ribose-binding periplasmic protein	842295	AT1G60010	no
1394	AT4G02425	LYR motif protein	828030	AT4G02425	no
1395	AT4G25940	ENTH/ANTH/VHS superfamily protein	828700	AT4G25940	no
1396	AT2G36650	CHUP1-like protein	818237	AT2G36650	no
1397	WHY3	ssDNA-binding transcriptional regulator	814803	AT2G02740	no
1398	DOT3	Phototropic-responsive NPH3 family protein	830889	AT5G10250	no
1399	AT4G22214	Defensin-like (DEFL) family protein	828314	AT4G22214	no
1400	AT3G23080	Polyketide cyclase/dehydrase and lipid transport superfamily protein	821882	AT3G23080	no
1401	MHK	Protein kinase superfamily protein	826915	AT4G13020	no
1402	AT3G45070	P-loop containing nucleoside triphosphate hydrolases superfamily protein	823642	AT3G45070	no
1403	AT3G25597	transmembrane protein	3768932	AT3G25597	no
1404	NPSN11	Putative plant snare 11	818086	AT2G35190	no
1405	AT3G58980	F-box family protein	825067	AT3G58980	no
1406	AT4G01200	Calcium-dependent lipid-binding (CaLB domain) family protein	828043	AT4G01200	no
1407	RIN2	RPM1 interacting protein 2	828626	AT4G25230	no
1408	CYP83B1	cytochrome P450: family 83: subfamily B: polypeptide 1	829277	AT4G31500	no
1409	AT4G17280	Auxin-responsive family protein	827442	AT4G17280	no
1410	FRI	FRIGIDA-like protein	828044	AT4G00650	no
1411	SVL1	SHV3-like 1	835641	AT5G55480	no
1412	UGT72E3	UDP-Glycosyltransferase superfamily protein	832700	AT5G26310	no
1413	LSH10	LIGHT-DEPENDENT SHORT HYPOCOTYLS-like protein (DUF640)	818861	AT2G42610	no
1414	PAC	pale cress protein (PAC)	819424	AT2G48120	no
1415	AT1G29980	choice-of-anchor C domain protein: putative (Protein of unknown function: DUF642)	839877	AT1G29980	no
1416	BSK2	BR-signaling kinase 2	834700	AT5G46570	no
1417	AT1G11100	SNF2 domain-containing protein / helicase domain-containing protein / zinc finger protein-like protein	837651	AT1G11100	no
1418	COB	COBRA-like extracellular glycosyl-phosphatidyl inositol-anchored protein family	836213	AT5G60920	no
1419	PPa6	pyrophosphorylase 6	830824	AT5G09650	no
1420	NTMC2T5.2	Calcium-dependent lipid-binding (CaLB domain) family protein	821520	AT3G19830	no
1421	AT4G14650	hypothetical protein	827115	AT4G14650	no
1422	AT4G15390	HXXXD-type acyl-transferase family protein	827205	AT4G15390	no
1423	AT3G08920	Rhodanese/Cell cycle control phosphatase superfamily protein	820041	AT3G08920	no
1424	AT2G38680	5'-nucleotidase / magnesium ion binding protein	818450	AT2G38680	no
1425	TXND9	thioredoxin-like/ATP-binding protein	816416	AT2G18990	no
1426	CSLG1	cellulose synthase like G1	828501	AT4G24010	no
1427	JR1	Mannose-binding lectin superfamily protein	820895	AT3G16470	no
1428	AT3G58930	F-box/RNI-like superfamily protein	825062	AT3G58930	no
1429	AT4G06120		28719736	AT4G06120	no
1430	MAPKKK15	mitogen-activated protein kinase kinase kinase 15	835600	AT5G55090	no
1431	APT2	adenine phosphoribosyl transferase 2	844345	AT1G80050	no
1432	AT4G02815		28719442	AT4G02815	no
1433	AT3G17940	Galactose mutarotase-like superfamily protein	820642	AT3G17940	no
1434	AT3G08670	serine/arginine repetitive matrix-like protein	820014	AT3G08670	no
1435	AT1G80850	DNA glycosylase superfamily protein	844424	AT1G80850	no
1436	PAR1	phy rapidly regulated 1	818887	AT2G42870	no
1437	AT4G33770	Inositol 1:3:4-trisphosphate 5/6-kinase family protein	829519	AT4G33770	no
1438	AT1G16000	GAG1At protein	838170	AT1G16000	no
1439	AT1G33480	RING/U-box superfamily protein	840242	AT1G33480	no
1440	RABA5E	Rab GTPase-like A5A protein	837091	AT1G05810	no
1441	MYB29	myb domain protein 29	830662	AT5G07690	no
1442	AT4G13040	Integrase-type DNA-binding superfamily protein	826918	AT4G13040	no
1443	PRF1	profilin 1	816495	AT2G19760	no
1444	NEK5	Serine/Threonine kinase catalytic domain protein	821634	AT3G20860	no
1445	RER1	reticulata-related 1	832342	AT5G22790	no
1446	CPC	Homeodomain-like superfamily protein	819249	AT2G46410	no
1447	MKK3	mitogen-activated protein kinase kinase 3	834042	AT5G40440	no
1448	IREG3	iron-regulated protein 3	832740	AT5G26820	no
1449	NAC3	NAC domain containing protein 3	822547	AT3G29035	no
1450	AT1G78530	Protein kinase superfamily protein	844189	AT1G78530	no
1451	LETM2	LETM1-like protein	842865	AT1G65540	no
1452	SERK5	somatic embryogenesis receptor-like kinase 5	815863	AT2G13800	no
1453	CKI1	casein kinase I	827076	AT4G14340	no
1454	LYK4	protein kinase family protein / peptidoglycan-binding LysM domain-containing protein	816909	AT2G23770	no
1455	GIF3	GRF1-interacting factor 3	827995	AT4G00850	no
1456	AT5G52545	RNA-binding protein-like RNA recognition motif protein	835331	AT5G52545	no
1457	AT4G10430	TMPIT-like protein	826635	AT4G10430	no
1458	ABCG35	pleiotropic drug resistance 7	838087	AT1G15210	no
1459	AT1G20816	outer envelope pore-like protein	838673	AT1G20816	no
1460	PIP1B	plasma membrane intrinsic protein 1B	819204	AT2G45960	no
1461	AT1G73390	Endosomal targeting BRO1-like domain-containing protein	843674	AT1G73390	no
1462	PHYB	phytochrome B	816394	AT2G18790	no
1463	UMAMIT1	nodulin MtN21 /EamA-like transporter family protein	834573	AT5G45370	no
1464	AT5G55960	transmembrane protein C9orf5 protein	835694	AT5G55960	no
1465	AT4G17260	Lactate/malate dehydrogenase family protein	827440	AT4G17260	no
1466	AT2G40860	protein kinase family protein / protein phosphatase 2C (PP2C) family protein	818684	AT2G40860	no
1467	RNS1	ribonuclease 1	814828	AT2G02990	no
1468	ABF4	ABRE binding factor 4	821463	AT3G19290	no
1469	SBP2	selenium-binding protein 2	827040	AT4G14040	no
1470	CYP705A25	cytochrome P450: family 705: subfamily A: polypeptide 25	841477	AT1G50560	no
1471	ABCI19	P-loop containing nucleoside triphosphate hydrolases superfamily protein	839376	AT1G03905	no
1472	AT2G21820	seed maturation protein	816718	AT2G21820	no
1473	PGIP2	polygalacturonase inhibiting protein 2	830578	AT5G06870	no
1474	AT4G38670	Pathogenesis-related thaumatin superfamily protein	830023	AT4G38670	no
1475	AT1G15830	hypothetical protein	838153	AT1G15830	no
1476	AT1G25230	Calcineurin-like metallo-phosphoesterase superfamily protein	839105	AT1G25230	no
1477	APC1	Mitochondrial substrate carrier family protein	836303	AT5G61810	no
1478	AT1G03220	Eukaryotic aspartyl protease family protein	838517	AT1G03220	no
1479	AT1G67950	RNA-binding (RRM/RBD/RNP motifs) family protein	843123	AT1G67950	no
1480	AT2G18770	P-loop containing nucleoside triphosphate hydrolases superfamily protein	816392	AT2G18770	no
1481	AT5G59080	hypothetical protein	836025	AT5G59080	no
1482	AT5G07740	actin binding protein	3770686	AT5G07740	no
1483	ARF1	ADP-ribosylation factor 1	838957	AT1G23490	no
1484	AT3G01930	Major facilitator superfamily protein	821218	AT3G01930	no
1485	AT3G27250	hypothetical protein	822344	AT3G27250	no
1486	AT1G19690	NAD(P)-binding Rossmann-fold superfamily protein	838556	AT1G19690	no
1487	AT2G01220	Nucleotidylyl transferase superfamily protein	814650	AT2G01220	no
1488	ABCA10	ABC2 homolog 14	836296	AT5G61740	no
1489	AT4G36840	Galactose oxidase/kelch repeat superfamily protein	829837	AT4G36840	no
1490	UCNL	AGC (cAMP-dependent: cGMP-dependent and protein kinase C) kinase family protein	821631	AT3G20830	no
1491	AT1G67865	hypothetical protein	28717407	AT1G67865	no
1492	AT2G22890	Kua-ubiquitin conjugating enzyme hybrid localization domain-containing protein	816820	AT2G22890	no
1493	AT4G23490	fringe-like protein (DUF604)	828447	AT4G23490	no
1494	AT5G19930	integral membrane protein (Protein of unknown function DUF92: transmembrane)	832115	AT5G19930	no
1495	PMT6	Major facilitator superfamily protein	829820	AT4G36670	no
1496	BRX-LIKE3	BREVIS RADIX-like 3	841858	AT1G54180	no
1497	ROT3	Cytochrome P450 superfamily protein	829790	AT4G36380	no
1498	ABC4	UbiA prenyltransferase family protein	842354	AT1G60600	no
1499	AT2G05760	Xanthine/uracil permease family protein	815127	AT2G05760	no
1500	AT5G54660	HSP20-like chaperones superfamily protein	835555	AT5G54660	no
1501	AT1G67480	Galactose oxidase/kelch repeat superfamily protein	843069	AT1G67480	no
1502	OFP18	ovate family protein 18	824420	AT3G52540	no
1503	AT5G22355	Cysteine/Histidine-rich C1 domain family protein	832296	AT5G22355	no
1504	AT1G60750	NAD(P)-linked oxidoreductase superfamily protein	3767587	AT1G60750	no
1505	PTI1-4	Protein kinase superfamily protein	819320	AT2G47060	no
1506	PARP2	poly(ADP-ribose) polymerase	828049	AT4G02390	no
1507	AGC1.5	AGC kinase 1.5	820450	AT3G12690	no
1508	AT4G23730	Galactose mutarotase-like superfamily protein	828473	AT4G23730	no
1509	RGP2	reversibly glycosylated polypeptide 2	831419	AT5G15650	no
1510	CGR3	transmembrane protein	836710	AT5G65810	no
1511	AT1G13730	Nuclear transport factor 2 (NTF2) family protein with RNA binding (RRM-RBD-RNP motifs) domain-containing protein	837933	AT1G13730	no
1512	AT2G34150	SCAR family protein	817976	AT2G34150	no
1513	AT1G58410	Disease resistance protein (CC-NBS-LRR class) family	842210	AT1G58410	no
1514	AOC4	allene oxide cyclase 4	837888	AT1G13280	no
1515	UGD3	UDP-glucose 6-dehydrogenase family protein	831402	AT5G15490	no
1516	AT5G18850	Low-density receptor-like protein	832003	AT5G18850	no
1517	NIP1;2	NOD26-like intrinsic protein 1;2	827626	AT4G18910	no
1518	AT4G29960	transmembrane protein	829119	AT4G29960	no
1519	AT2G27830	hypothetical protein	817330	AT2G27830	no
1520	TRM9	RNA-binding (RRM/RBD/RNP motifs) family protein	840048	AT1G31600	no
1521	PUT1	Amino acid permease family protein	840072	AT1G31820	no
1522	WOX5	WUSCHEL related homeobox 5	820297	AT3G11260	no
1523	BETA-OHASE 2	beta-carotene hydroxylase 2	835334	AT5G52570	no
1524	AT4G09500	UDP-Glycosyltransferase superfamily protein	826534	AT4G09500	no
1525	AT4G35270	Plant regulator RWP-RK family protein	829680	AT4G35270	no
1526	AT2G34060	Peroxidase superfamily protein	817967	AT2G34060	no
1527	AT2G36680	Modifier of rudimentary (Mod(r)) protein	818240	AT2G36680	no
1528	AT2G40316	autophagy-like protein	818624	AT2G40316	no
1529	XERICO	RING/U-box superfamily protein	814962	AT2G04240	no
1530	AT1G25480	aluminum activated malate transporter family protein	839134	AT1G25480	no
1531	EXPB1	expansin B1	816604	AT2G20750	no
1532	AT3G56570	SET domain-containing protein	824824	AT3G56570	no
1533	AT5G38030	MATE efflux family protein	833782	AT5G38030	no
1534	AT1G57540	40S ribosomal protein	842129	AT1G57540	no
1535	AT3G23870	magnesium transporter NIPA (DUF803)	821970	AT3G23870	no
1536	LBD25	LOB domain-containing protein 25	822387	AT3G27650	no
1537	UGT84A4	UDP-Glycosyltransferase superfamily protein	827222	AT4G15500	no
1538	AT1G68600	aluminum activated malate transporter family protein	843190	AT1G68600	no
1539	AAS	Pyridoxal phosphate (PLP)-dependent transferases superfamily protein	816553	AT2G20340	no
1540	AT2G20670	sugar phosphate exchanger: putative (DUF506)	816595	AT2G20670	no
1541	EPS1	HXXXD-type acyl-transferase family protein	836851	AT5G67160	no
1542	AT5G47700	60S acidic ribosomal protein family	834821	AT5G47700	no
1543	FLA2	FASCICLIN-like arabinogalactan 2	826885	AT4G12730	no
1544	AT4G02120	CTP synthase family protein	828137	AT4G02120	no
1545	AT3G21770	Peroxidase superfamily protein	821731	AT3G21770	no
1546	AT5G26730	Fasciclin-like arabinogalactan family protein	832716	AT5G26730	no
1547	GAMMA CAL1	gamma carbonic anhydrase like 1	836470	AT5G63510	no
1548	AT1G61310	LRR and NB-ARC domains-containing disease resistance protein	842425	AT1G61310	no
1549	RPL27	ribosomal protein large subunit 27	834097	AT5G40950	no
1550	AT3G21670	Major facilitator superfamily protein	821721	AT3G21670	no
1551	GSTU4	glutathione S-transferase tau 4	817495	AT2G29460	no
1552	SBT4.12	subtilase 4.12	836026	AT5G59090	no
1553	CYSD2	cysteine synthase D2	832872	AT5G28020	no
1554	PROPEP1	precursor of peptide 1	836613	AT5G64900	no
1555	AT1G77370	Glutaredoxin family protein	844073	AT1G77370	no
1556	AT2G24420	DNA repair ATPase-like protein	816978	AT2G24420	no
1557	SS3	starch synthase 3	837716	AT1G11720	no
1558	CBL	cystathionine beta-lyase	824872	AT3G57050	no
1559	MUM4	NAD-dependent epimerase/dehydratase family protein	841785	AT1G53500	no
1560	MIR414		28717405	AT1G67195	no
1561	AT1G72175	E3 ubiquitin-protein ligase RNF170-like protein (DUF 1232)	843549	AT1G72175	no
1562	BGLU25	beta glucosidase 25	821201	AT3G03640	no
1563	PHOT2	phototropin 2	835926	AT5G58140	no
1564	AT5G39940	FAD/NAD(P)-binding oxidoreductase family protein	833991	AT5G39940	no
1565	HY5	Basic-leucine zipper (bZIP) transcription factor family protein	830996	AT5G11260	no
1566	PrfB3	peptide chain release factor	824886	AT3G57190	no
1567	TRM24	hypothetical protein	835260	AT5G51850	no
1568	VAMP728	vesicle-associated membrane protein 728	822087	AT3G24890	no
1569	CIA2	chloroplast import apparatus 2	835824	AT5G57180	no
1570	RNR2A	ribonucleotide reductase 2A	821937	AT3G23580	no
1571	WRKY19	protein kinase family protein	826810	AT4G12020	no
1572	AT3G28940	AIG2-like (avirulence induced gene) family protein	822530	AT3G28940	no
1573	CYP710A1	cytochrome P450: family 710: subfamily A: polypeptide 1	818013	AT2G34500	no
1574	GLH	SGNH hydrolase-type esterase superfamily protein	818396	AT2G38180	peroxisomes
1575	AT2G24170	Endomembrane protein 70 protein family	816951	AT2G24170	no
1576	AN3	SSXT family protein	832968	AT5G28640	no
1577	AT1G77330	2-oxoglutarate (2OG) and Fe(II)-dependent oxygenase superfamily protein	844069	AT1G77330	no
1578	MYB63	myb domain protein 63	844259	AT1G79180	no
1579	AT2G28605	Photosystem II reaction center PsbP family protein	817409	AT2G28605	no
1580	AT1G52347		5007793	AT1G52347	no
1581	UBC9	ubiquitin conjugating enzyme 9	828909	AT4G27960	no
1582	AT5G53010	calcium-transporting ATPase	835380	AT5G53010	no
1583	AT5G54200	Transducin/WD40 repeat-like superfamily protein	835508	AT5G54200	no
1584	AT5G55060	Rab3 GTPase-activating protein catalytic subunit	835597	AT5G55060	no
1585	AT1G78180	Mitochondrial substrate carrier family protein	844154	AT1G78180	no
1586	AT3G06410	Zinc finger C-x8-C-x5-C-x3-H type family protein	819815	AT3G06410	no
1587	RBL3	RHOMBOID-like protein 3	830616	AT5G07250	no
1588	AT5G14120	Major facilitator superfamily protein	831262	AT5G14120	no
1589	COR413-PM1	cold regulated 413 plasma membrane 1	816092	AT2G15970	no
1590	PTAC16	plastid transcriptionally active 16	823831	AT3G46780	no
1591	RPT2	Phototropic-responsive NPH3 family protein	817601	AT2G30520	no
1592	AT1G03743		3766653	AT1G03743	no
1593	AT1G53380	hypothetical protein (DUF641)	841774	AT1G53380	no
1594	AT3G52360	transmembrane protein	824401	AT3G52360	no
1595	CYP708A3	cytochrome P450: family 708: subfamily A: polypeptide 3	844185	AT1G78490	no
1596	AT1G15150	MATE efflux family protein	838080	AT1G15150	no
1597	AT1G16220	Protein phosphatase 2C family protein	838190	AT1G16220	no
1598	AT3G52470	Late embryogenesis abundant (LEA) hydroxyproline-rich glycoprotein family	824412	AT3G52470	no
1599	CCoAOMT1	S-adenosyl-L-methionine-dependent methyltransferases superfamily protein	829551	AT4G34050	no
1600	AT4G34220	Leucine-rich repeat protein kinase family protein	829571	AT4G34220	no
1601	RFO1	Wall-associated kinase family protein	844306	AT1G79670	no
1602	AT2G32295	EXS (ERD1/XPR1/SYG1) family protein	817790	AT2G32295	no
1603	AT5G40405	Tetratricopeptide repeat (TPR)-like superfamily protein	3771385	AT5G40405	no
1604	AT3G19508	complex 1 protein: LYR family protein	5008013	AT3G19508	no
1605	MLO15	Seven transmembrane MLO family protein	819017	AT2G44110	no
1606	AT4G27720	Major facilitator superfamily protein	828886	AT4G27720	no
1607	AT3G61420	BSD domain (BTF2-like transcription factors: Synapse-associated proteins and DOS2-like proteins)	825315	AT3G61420	no
1608	PFK1	phosphofructokinase 1	829043	AT4G29220	no
1609	OASA2	O-acetylserine (thiol) lyase (OAS-TL)	821817	AT3G22460	no
1610	PLDGAMMA2	phospholipase D gamma 2	826789	AT4G11830	no
1611	DAA1	P-loop containing nucleoside triphosphate hydrolases superfamily protein	842716	AT1G64110	no
1612	GPRI1	GBF's pro-rich region-interacting factor 1	816579	AT2G20570	no
1613	CYP706A6	cytochrome P450: family 706: subfamily A: polypeptide 6	826841	AT4G12320	no
1614	AT1G48540	Outer arm dynein light chain 1 protein	841275	AT1G48540	no
1615	AT2G03965	hypothetical protein	28717535	AT2G03965	no
1616	CYP707A1	cytochrome P450: family 707: subfamily A: polypeptide 1	827663	AT4G19230	no
1617	AT4G20210	Terpenoid cyclases/Protein prenyltransferases superfamily protein	827768	AT4G20210	no
1618	AT3G56840	FAD-dependent oxidoreductase family protein	824851	AT3G56840	no
1619	CLT1	CRT (chloroquine-resistance transporter)-like transporter 1	832058	AT5G19380	no
1620	LRL3	LJRHL1-like 3	835913	AT5G58010	no
1621	AT4G02010	Protein kinase superfamily protein	827234	AT4G02010	no
1622	AT1G52342	hypothetical protein	28717346	AT1G52342	no
1623	AT4G03260	Outer arm dynein light chain 1 protein	828003	AT4G03260	no
1624	AT5G49470	PAS domain-containing protein tyrosine kinase family protein	835007	AT5G49470	no
1625	CIPK1	CBL-interacting protein kinase 1	821016	AT3G17510	no
1626	AT4G31060	Integrase-type DNA-binding superfamily protein	829233	AT4G31060	no
1627	AT4G04925	transmembrane protein	2745645	AT4G04925	no
1628	AT2G33630	NAD(P)-binding Rossmann-fold superfamily protein	817929	AT2G33630	no
1629	AT1G25240	ENTH/VHS/GAT family protein	839107	AT1G25240	no
1630	ERF4	ethylene responsive element binding factor 4	820752	AT3G15210	no
1631	AT3G18320	F-box and associated interaction domains-containing protein	821361	AT3G18320	no
1632	AT1G67510	Leucine-rich repeat protein kinase family protein	843072	AT1G67510	no
1633	AT5G06280	hypothetical protein	830516	AT5G06280	no
1634	GRF7	growth-regulating factor 7	835447	AT5G53660	no
1635	PIP5K6	Phosphatidylinositol-4-phosphate 5-kinase family protein	819987	AT3G07960	no
1636	3BETAHSD/D1	3beta-hydroxysteroid-dehydrogenase/decarboxylase	841132	AT1G47290	no
1637	AT1G26920	zinc finger CCHC domain protein	839582	AT1G26920	no
1638	POL	Protein phosphatase 2C family protein	819306	AT2G46920	no
1639	AT1G33230	TMPIT-like protein	840217	AT1G33230	no
1640	AT5G39530	hypothetical protein (DUF1997)	833949	AT5G39530	no
1641	AT3G18773	RING/U-box superfamily protein	821409	AT3G18773	no
1642	AT5G20080	FAD/NAD(P)-binding oxidoreductase	832130	AT5G20080	no
1643	FH3	formin 3	827184	AT4G15200	no
1644	AT4G17480	alpha/beta-Hydrolases superfamily protein	827459	AT4G17480	no
1645	AT3G45443	hypothetical protein	823683	AT3G45443	no
1646	PMI1	plastid movement impaired1	840860	AT1G42550	no
1647	AT3G48550	SHOOT GRAVITROPISM-like protein	824014	AT3G48550	no
1648	AT5G56100	glycine-rich protein / oleosin	835709	AT5G56100	no
1649	AT4G13575	hypothetical protein	6240258	AT4G13575	no
1650	CYP86A4	cytochrome P450: family 86: subfamily A: polypeptide 4	839347	AT1G01600	no
1651	AT1G70130	Concanavalin A-like lectin protein kinase family protein	843349	AT1G70130	no
1652	ATWHY2	WHIRLY 2	843467	AT1G71260	no
1653	RLP54	receptor like protein 54	834015	AT5G40170	no
1654	BAG3	BCL-2-associated athanogene 3	830613	AT5G07220	no
1655	AGAL2	alpha-galactosidase 2	830735	AT5G08370	no
1656	At1g78690p	Phospholipid/glycerol acyltransferase family protein	844205	AT1G78690	no
1657	mtACP2	mitochondrial acyl carrier protein 2	842836	AT1G65290	no
1658	CAS1	cycloartenol synthase 1	815275	AT2G07050	no
1659	AT1G71080	RNA polymerase II transcription elongation factor	843448	AT1G71080	no
1660	AT3G05410	Photosystem II reaction center PsbP family protein	819705	AT3G05410	no
1661	AT3G03100	NADH:ubiquinone oxidoreductase: 17.2kDa subunit	821104	AT3G03100	no
1662	UGP1	UDP-GLUCOSE PYROPHOSPHORYLASE 1	821313	AT3G03250	no
1663	AT2G36730	Pentatricopeptide repeat (PPR) superfamily protein	818245	AT2G36730	no
1664	BGLU22	Glycosyl hydrolase superfamily protein	842945	AT1G66280	no
1665	AT2G16660	Major facilitator superfamily protein	816167	AT2G16660	no
1666	AT2G18400	ribosomal protein L6 family protein	816355	AT2G18400	no
1667	CXE12	alpha/beta-Hydrolases superfamily protein	824030	AT3G48690	no
1668	ATPD	F-type H+-transporting ATPase subunit delta	826551	AT4G09650	no
1669	AT4G33550	Bifunctional inhibitor/lipid-transfer protein/seed storage 2S albumin superfamily protein	829494	AT4G33550	no
1670	NCRK	Protein kinase superfamily protein	817371	AT2G28250	no
1671	UGT71D1	UDP-glucosyl transferase 71D1	817523	AT2G29730	no
1672	AT4G37480	Chaperone DnaJ-domain superfamily protein	829903	AT4G37480	no
1673	AT5G02280	SNARE-like superfamily protein	831680	AT5G02280	no
1674	AGL42	AGAMOUS-like 42	836337	AT5G62165	no
1675	AT1G50280	Phototropic-responsive NPH3 family protein	841450	AT1G50280	no
1676	AT3G02750	Protein phosphatase 2C family protein	820909	AT3G02750	no
1677	AT5G19230	Glycoprotein membrane precursor GPI-anchored	832043	AT5G19230	no
1678	GXM2	glucuronoxylan 4-O-methyltransferase-like protein (DUF579)	826590	AT4G09990	no
1679	IQD19	IQ-domain 19	827130	AT4G14750	no
1680	AT2G37050	Leucine-rich repeat protein kinase family protein	818281	AT2G37050	no
1681	AT2G41050	PQ-loop repeat family protein / transmembrane family protein	818704	AT2G41050	no
1682	AT1G79570	kinase superfamily with octicosapeptide/Phox/Bem1p domain-containing protein	844295	AT1G79570	no
1683	PRR1	pinoresinol reductase 1	840102	AT1G32100	no
1684	PSBO2	photosystem II subunit O-2	824246	AT3G50820	no
1685	AT3G54580	Proline-rich extensin-like family protein	824623	AT3G54580	no
1686	AT4G28350	Concanavalin A-like lectin protein kinase family protein	828950	AT4G28350	no
1687	AT4G05040	ankyrin repeat family protein	825846	AT4G05040	no
1688	ROC1	rotamase CYP 1	830029	AT4G38740	no
1689	AT2G26390	Serine protease inhibitor (SERPIN) family protein	817179	AT2G26390	no
1690	URE	urease	843076	AT1G67550	no
1691	AT4G02110	transcription coactivator	828135	AT4G02110	no
1692	AT4G09520	Cofactor-independent phosphoglycerate mutase	826536	AT4G09520	no
1693	RHA1A	RING-H2 finger A1A	826739	AT4G11370	no
1694	FLA12	FASCICLIN-like arabinogalactan-protein 12	836170	AT5G60490	no
1695	OXP1	oxoprolinase 1	833761	AT5G37830	no
1696	AT3G07890	Ypt/Rab-GAP domain of gyp1p superfamily protein	819980	AT3G07890	no
1697	AT1G62510	Bifunctional inhibitor/lipid-transfer protein/seed storage 2S albumin superfamily protein	842548	AT1G62510	no
1698	AT5G39580	Peroxidase superfamily protein	833954	AT5G39580	no
1699	BGAL12	beta-galactosidase 12	828720	AT4G26140	no
1700	AT2G18670	RING/U-box superfamily protein	816382	AT2G18670	no
1701	AT1G54730	Major facilitator superfamily protein	841914	AT1G54730	no
1702	PIL5	phytochrome interacting factor 3-like 5	816538	AT2G20180	no
1703	AT3G19340	aminopeptidase (DUF3754)	821468	AT3G19340	no
1704	DJ1C	Class I glutamine amidotransferase-like superfamily protein	829548	AT4G34020	no
1705	ARR6	response regulator 6	836412	AT5G62920	no
1706	GAT1_2.1	Class I glutamine amidotransferase-like superfamily protein	838069	AT1G15040	no
1707	AT4G22758	PPR containing protein	10723027	AT4G22758	no
1708	MVD1	mevalonate diphosphate decarboxylase 1	818452	AT2G38700	no
1709	MES10	methylesterase	824208	AT3G50440	no
1710	AT3G07950	rhomboid protein-like protein	819986	AT3G07950	no
1711	NKS1	ubiquitin-associated protein (DUF1068)	829226	AT4G30996	no
1712	AT5G58900	Homeodomain-like transcriptional regulator	836007	AT5G58900	no
1713	AT4G36090	oxidoreductase: 2OG-Fe(II) oxygenase family protein	829765	AT4G36090	no
1714	IBH1	ILI1 binding bHLH 1	818908	AT2G43060	no
1715	RCI2B	Low temperature and salt responsive protein family	819758	AT3G05890	no
1716	ATSDI1	Tetratricopeptide repeat (TPR)-like superfamily protein	834943	AT5G48850	no
1717	AT5G49690	UDP-Glycosyltransferase superfamily protein	835032	AT5G49690	no
1718	RHA3B	RING-H2 finger A3B	829700	AT4G35480	no
1719	AT4G16680	P-loop containing nucleoside triphosphate hydrolases superfamily protein	827370	AT4G16680	no
1720	AT2G01008	maternal effect embryo arrest protein	6241151	AT2G01008	no
1721	BLT	branchless trichome	842777	AT1G64690	no
1722	AT1G32740	SBP (S-ribonuclease binding protein) family protein	840168	AT1G32740	no
1723	AT5G44490	FBD: F-box: Skp2-like and Leucine Rich Repeat domains containing protein	834476	AT5G44490	no
1724	AT4G21880	Pentatricopeptide repeat (PPR) superfamily protein	828277	AT4G21880	no
1725	GSA1	glutamate-1-semialdehyde-2:1-aminomutase	836476	AT5G63570	no
1726	TPPJ	Haloacid dehalogenase-like hydrolase (HAD) superfamily protein	836638	AT5G65140	no
1727	AT2G25610	ATPase: F0/V0 complex: subunit C protein	817101	AT2G25610	no
1728	AT1G80180	hypothetical protein	844358	AT1G80180	no
1729	AT1G49580	Calcium-dependent protein kinase (CDPK) family protein	841382	AT1G49580	no
1730	AT1G31935		6241487	AT1G31935	no
1731	CAT3	catalase 3	838651	AT1G20620	peroxisomes
1732	ACP4	acyl carrier protein 4	828608	AT4G25050	no
1733	AT3G56210	ARM repeat superfamily protein	824787	AT3G56210	no
1734	AT4G26010	Peroxidase superfamily protein	828707	AT4G26010	no
1735	AT5G64230	1:8-cineole synthase	836544	AT5G64230	no
1736	AT1G69580	Homeodomain-like superfamily protein	843294	AT1G69580	no
1737	GUN4	protein GENOMES UNCOUPLED 4	825109	AT3G59400	no
1738	AT3G61010	Ferritin/ribonucleotide reductase-like family protein	825272	AT3G61010	no
1739	EXPA13	expansin A13	821224	AT3G03220	no
1740	AT4G34360	S-adenosyl-L-methionine-dependent methyltransferases superfamily protein	829586	AT4G34360	no
1741	SMP2	NADH dehydrogenase (ubiquinone)s	814780	AT2G02510	peroxisomes
1742	AT1G70550	NEP-interacting protein: putative (DUF239)	843392	AT1G70550	no
1743	SRT2	sirtuin 2	830782	AT5G09230	no
1744	ATMND1	Mnd1 family protein	829038	AT4G29170	no
1745	MAPKKK21	mitogen-activated protein kinase kinase kinase 21	3770588	AT4G36950	no
1746	AT5G41810	Avr9/Cf-9 rapidly elicited protein	834186	AT5G41810	no
1747	PRIN2	Serine/Threonine-kinase	837593	AT1G10522	no
1748	ARR9	response regulator 9	824871	AT3G57040	no
1749	RUG3	Regulator of chromosome condensation (RCC1) family protein	836208	AT5G60870	no
1750	AT1G45230	DCL protein (DUF3223)	841096	AT1G45230	no
1751	GDPD5	PLC-like phosphodiesterases superfamily protein	843761	AT1G74210	no
1752	AT4G32920	glycine-rich protein	829429	AT4G32920	no
1753	XIF	myosin-like protein XIF	817748	AT2G31900	no
1754	SRD2	snRNA activating complex family protein	839756	AT1G28560	no
1755	AT1G74070	Cyclophilin-like peptidyl-prolyl cis-trans isomerase family protein	843747	AT1G74070	no
1756	AT1G79870	D-isomer specific 2-hydroxyacid dehydrogenase family protein	844326	AT1G79870	no
1757	AT5G45500	RNI-like superfamily protein	834586	AT5G45500	no
1758	GRF4	growth-regulating factor 4	824457	AT3G52910	no
1759	SKIP1	SKP1 interacting partner 1	835901	AT5G57900	no
1760	DML3	demeter-like protein 3	829552	AT4G34060	no
1761	CYP97B3	cytochrome P450: family 97: subfamily B: polypeptide 3	827177	AT4G15110	no
1762	AT2G35830	ureidoglycolate hydrolase	818156	AT2G35830	no
1763	AT1G75370	Sec14p-like phosphatidylinositol transfer family protein	843873	AT1G75370	no
1764	AT3G62190	Chaperone DnaJ-domain superfamily protein	825392	AT3G62190	no
1765	AT3G19100	Protein kinase superfamily protein	821445	AT3G19100	no
1766	MSRB4	methionine sulfoxide reductase B4	825818	AT4G04810	no
1767	AT1G48840	heat-inducible transcription repressor (DUF639)	841306	AT1G48840	no
1768	TPK1	thiamin pyrophosphokinase1	839303	AT1G02880	no
1769	TET2	tetraspanin2	816477	AT2G19580	no
1770	MRH2	Armadillo/beta-catenin repeat family protein / kinesin motor family protein	824652	AT3G54870	no
1771	AT5G50740	Heavy metal transport/detoxification superfamily protein	835146	AT5G50740	no
1772	DRL1	dihydroflavonol 4-reductase-like1	829695	AT4G35420	no
1773	AT2G30480	hypothetical protein	817598	AT2G30480	no
1774	AT1G14250	GDA1/CD39 nucleoside phosphatase family protein	837986	AT1G14250	no
1775	AT1G72125	Major facilitator superfamily protein	6241212	AT1G72125	no
1776	AT4G01410	Late embryogenesis abundant (LEA) hydroxyproline-rich glycoprotein family	828166	AT4G01410	no
1777	LRP1	Lateral root primordium (LRP) protein-like protein	831108	AT5G12330	no
1778	AT5G15050	Core-2/I-branching beta-1:6-N-acetylglucosaminyltransferase family protein	831357	AT5G15050	no
1779	AT2G42640	Mitogen activated protein kinase kinase kinase-like protein	818864	AT2G42640	no
1780	AT5G06800	myb-like HTH transcriptional regulator family protein	830570	AT5G06800	no
1781	AT5G45430	Protein kinase superfamily protein	834579	AT5G45430	no
1782	AT4G30170	Peroxidase family protein	829140	AT4G30170	no
1783	AT1G49990	F-box family protein	841423	AT1G49990	no
1784	BPEp	transcription factor BIG PETAL P (BPE)	842254	AT1G59640	no
1785	WAVH2	Zinc finger (C3HC4-type RING finger) family protein	836695	AT5G65683	no
1786	RLP57	receptor like protein 57	836712	AT5G65830	no
1787	EMS1	Leucine-rich repeat transmembrane protein kinase	830619	AT5G07280	no
1788	IQD11	IQ-domain 11	831188	AT5G13460	no
1789	AT5G64110	Peroxidase superfamily protein	836532	AT5G64110	no
1790	AT2G41440	agamous-like MADS-box protein	818742	AT2G41440	no
1791	QWRF9	QWRF motif protein (DUF566)	834333	AT5G43160	no
1792	AT4G30680	Initiation factor eIF-4 gamma: MA3	829191	AT4G30680	no
1793	GSTU27	glutathione S-transferase tau 27	823491	AT3G43800	no
1794	AXL	AXR1-like protein	817802	AT2G32410	no
1795	AT2G38823	hypothetical protein	818465	AT2G38823	no
1796	LTP	lipid transfer protein	815994	AT2G15050	no
1797	ASA1	anthranilate synthase alpha subunit 1	830457	AT5G05730	no
1798	AT4G20760	NAD(P)-binding Rossmann-fold superfamily protein	827824	AT4G20760	no
1799	AT4G23500	Pectin lyase-like superfamily protein	828450	AT4G23500	no
1800	AT5G15910	NAD(P)-binding Rossmann-fold superfamily protein	831448	AT5G15910	no
1801	UBC37	ubiquitin-conjugating enzyme 37	822045	AT3G24515	no
1802	SCL13	SCARECROW-like 13	827435	AT4G17230	no
1803	AT5G03553	hypothetical protein	28720566	AT5G03553	no
1804	AT2G21960	transmembrane protein	816732	AT2G21960	no
1805	AT1G07440	NAD(P)-binding Rossmann-fold superfamily protein	837256	AT1G07440	no
1806	HMT3	homocysteine S-methyltransferase 3	821845	AT3G22740	no
1807	EOL2	ETO1-like 2	835968	AT5G58550	no
1808	AT5G23890	GPI-anchored adhesin-like protein	832454	AT5G23890	no
1809	AGD8	ARF-GAP domain 8	827512	AT4G17890	no
1810	NRAMP2	NRAMP metal ion transporter 2	841127	AT1G47240	no
1811	AT5G03230	senescence regulator (Protein of unknown function: DUF584)	831900	AT5G03230	no
1812	CSTF77	Tetratricopeptide repeat (TPR)-like superfamily protein	838354	AT1G17760	no
1813	AT1G07187		28716614	AT1G07187	no
1814	LEC1	Histone superfamily protein	838800	AT1G21970	no
1815	AT2G21850	Cysteine/Histidine-rich C1 domain family protein	816721	AT2G21850	no
1816	AT5G16410	HXXXD-type acyl-transferase family protein	831502	AT5G16410	no
1817	AT4G11970	YTH family protein	826804	AT4G11970	no
1818	TIP2;2	tonoplast intrinsic protein 2;2	827446	AT4G17340	no
1819	AT3G45050	transmembrane protein	823640	AT3G45050	no
1820	AT1G06470	Nucleotide/sugar transporter family protein	837159	AT1G06470	no
1821	AT3G08660	Phototropic-responsive NPH3 family protein	820013	AT3G08660	no
1822	AT2G42960	Protein kinase superfamily protein	818898	AT2G42960	no
1823	AT1G30760	FAD-binding Berberine family protein	839958	AT1G30760	no
1824	HEXO1	beta-hexosaminidase 1	824692	AT3G55260	no
1825	PRMT7	protein arginine methyltransferase 7	827358	AT4G16570	no
1826	AT1G21010	poly polymerase	838695	AT1G21010	no
1827	AT5G67290	FAD-dependent oxidoreductase family protein	836864	AT5G67290	no
1828	AT1G07750	RmlC-like cupins superfamily protein	837290	AT1G07750	no
1829	RLP53	receptor like protein 53	832764	AT5G27060	no
1830	OFP13	ovate family protein 13	830361	AT5G04820	no
1831	SMO2-2	sterol 4-alpha-methyl-oxidase 2-2	817488	AT2G29390	no
1832	SS3	strictosidine synthase 3	843738	AT1G74000	no
1833	AT4G02620	vacuolar ATPase subunit F family protein	828221	AT4G02620	no
1834	MEE31	Mannose-6-phosphate isomerase: type I	820656	AT3G02570	no
1835	CYP72A15	cytochrome P450: family 72: subfamily A: polypeptide 15	820697	AT3G14690	no
1836	AT4G36860	LIM domain-containing protein	829839	AT4G36860	no
1837	AT5G38340	Disease resistance protein (TIR-NBS-LRR class) family	833816	AT5G38340	no
1838	AT1G50970	Membrane trafficking VPS53 family protein	841519	AT1G50970	no
1839	AT2G32140	transmembrane receptor	817773	AT2G32140	no
1840	AT1G66880	Protein kinase superfamily protein	843006	AT1G66880	no
1841	ABCG16	ABC-2 type transporter family protein	824675	AT3G55090	no
1842	BAG2	BCL-2-associated athanogene 2	836330	AT5G62100	no
1843	AT5G00660		28720286	AT5G00660	no
1844	PIP1A	plasma membrane intrinsic protein 1A	825316	AT3G61430	no
1845	ARFA1E	ADP-ribosylation factor A1E	825402	AT3G62290	no
1846	AT5G45210	Disease resistance protein (TIR-NBS-LRR class) family	834557	AT5G45210	no
1847	AT5G11410	Protein kinase superfamily protein	831012	AT5G11410	no
1848	AT3G17830	Molecular chaperone Hsp40/DnaJ family protein	821051	AT3G17830	no
1849	AT2G32170	S-adenosyl-L-methionine-dependent methyltransferases superfamily protein	817776	AT2G32170	no
1850	AT1G19970	ER lumen protein retaining receptor family protein	838586	AT1G19970	no
1851	AT1G76070	hypothetical protein	843939	AT1G76070	no
1852	AT3G55240	Plant protein 1589 of unknown function	824690	AT3G55240	no
1853	AT3G56260	hypothetical protein	824792	AT3G56260	no
1854	CPK4	calcium-dependent protein kinase 4	826541	AT4G09570	no
1855	AT4G12050	Putative AT-hook DNA-binding family protein	826813	AT4G12050	no
1856	AT1G78550	2-oxoglutarate (2OG) and Fe(II)-dependent oxygenase superfamily protein	844191	AT1G78550	no
1857	AT3G05170	Phosphoglycerate mutase family protein	819681	AT3G05170	no
1858	AT5G07030	Eukaryotic aspartyl protease family protein	830594	AT5G07030	no
1859	AT4G23740	Leucine-rich repeat protein kinase family protein	828474	AT4G23740	no
1860	AT5G25640	Rhomboid-related intramembrane serine protease family protein	832640	AT5G25640	no
1861	tny	Integrase-type DNA-binding superfamily protein	832650	AT5G25810	no
1862	AT2G28450	zinc finger (CCCH-type) family protein	817393	AT2G28450	no
1863	DWA3	Transducin/WD40 repeat-like superfamily protein	842414	AT1G61210	no
1864	AT2G38710	AMMECR1 family	818453	AT2G38710	no
1865	HB24	homeobox protein 24	816350	AT2G18350	no
1866	RLK	receptor-like kinase	836863	AT5G67280	no
1867	NTMC2T2.1	Calcium-dependent lipid-binding (CaLB domain) family protein	837052	AT1G05500	no
1868	ENDO3	endonuclease 3	828245	AT4G21590	no
1869	AT4G13500	transmembrane protein	826982	AT4G13500	no
1870	AT1G78790	centromere protein X	844215	AT1G78790	no
1871	BBX30	B-box type zinc finger family protein	3769879	AT4G15248	no
1872	AT1G60990	Glycine cleavage T-protein family	842391	AT1G60990	no
1873	AT1G23170	transmembrane protein (Protein of unknown function DUF2359: transmembrane)	838925	AT1G23170	no
1874	ACS11	1-aminocyclopropane-1-carboxylate synthase 11	826317	AT4G08040	no
1875	SR	serine racemase	826769	AT4G11640	no
1876	GH9C1	glycosyl hydrolase 9C1	841315	AT1G48930	no
1877	AT4G16380	Heavy metal transport/detoxification superfamily protein	2745712	AT4G16380	no
1878	AT5G66960	Prolyl oligopeptidase family protein	836830	AT5G66960	no
1879	AT5G43540	C2H2 and C2HC zinc fingers superfamily protein	834374	AT5G43540	no
1880	AT4G12010	Disease resistance protein (TIR-NBS-LRR class) family	826809	AT4G12010	no
1881	AOC3	allene oxide cyclase 3	822169	AT3G25780	no
1882	AT3G09490	Tetratricopeptide repeat (TPR)-like superfamily protein	820106	AT3G09490	no
1883	AT3G01335		28718477	AT3G01335	no
1884	EMB2279	pentatricopeptide (PPR) repeat-containing protein	839941	AT1G30610	no
1885	SOT16	sulfotransferase 16	843750	AT1G74100	no
1886	HHP3	heptahelical protein 3	816949	AT2G24150	no
1887	RD28	Aquaporin-like superfamily protein	818294	AT2G37180	no
1888	CKL13	casein kinase like 13	839520	AT1G04440	no
1889	AT4G18230	UDP-N-acetylglucosamine transferase subunit ALG14-like protein	827549	AT4G18230	no
1890	PAL2	phenylalanine ammonia-lyase 2	824493	AT3G53260	no
1891	JRG21	jasmonate-regulated gene 21	824763	AT3G55970	no
1892	NTT1	nucleotide transporter 1	844370	AT1G80300	no
1893	AT2G40530	transmembrane protein	818648	AT2G40530	no
1894	AT3G55230	Disease resistance-responsive (dirigent-like protein) family protein	824689	AT3G55230	no
1895	AT2G40010	Ribosomal protein L10 family protein	818589	AT2G40010	no
1896	NSP3	nitrile specifier protein 3	820886	AT3G16390	no
1897	HMT2	homocysteine methyltransferase 2	825500	AT3G63250	no
1898	AT3G20015	Eukaryotic aspartyl protease family protein	821540	AT3G20015	no
1899	CSLA02	cellulose synthase-like A02	832337	AT5G22740	no
1900	PTM	PHD type transcription factor with transmembrane domain protein (PTM)	833475	AT5G35210	no
1901	AT5G18360	Disease resistance protein (TIR-NBS-LRR class) family	831954	AT5G18360	no
1902	GSTF9	glutathione S-transferase PHI 9	817636	AT2G30860	no
1903	AT1G15290	Tetratricopeptide repeat (TPR)-like superfamily protein	838097	AT1G15290	no
1904	CYP79F1	cytochrome p450 79f1	838211	AT1G16410	no
1905	NUDX19	nudix hydrolase homolog 19	832129	AT5G20070	peroxisomes
1906	MYB59	myb domain protein 59	836099	AT5G59780	no
1907	AT5G04810	pentatricopeptide (PPR) repeat-containing protein	830360	AT5G04810	no
1908	AT3G47675	ternary complex factor MIP1 leucine-zipper protein	2745949	AT3G47675	no
1909	NDF5	NDH-dependent cyclic electron flow 5	841984	AT1G55370	no
1910	AT4G19045	Mob1/phocein family protein	7922308	AT4G19045	no
1911	AT1G09250	basic helix-loop-helix (bHLH) DNA-binding superfamily protein	837446	AT1G09250	no
1912	AT3G26085	CAAX amino terminal protease family protein	822206	AT3G26085	no
1913	SNRK2.4	Protein kinase superfamily protein	837637	AT1G10940	no
1914	AT5G49430	WD40/YVTN repeat and Bromo-WDR9-I-like domain-containing protein	835003	AT5G49430	no
1915	AT5G54530	serine protease: putative (Protein of unknown function: DUF538)	835541	AT5G54530	no
1916	AT3G18870	Mitochondrial transcription termination factor family protein	821420	AT3G18870	no
1917	AT2G35130	Tetratricopeptide repeat (TPR)-like superfamily protein	818079	AT2G35130	no
1918	AT5G03285		6241161	AT5G03285	no
1919	CYCD1;1	CYCLIN D1;1	843357	AT1G70210	no
1920	AT2G23370	cyclin delta-3	816869	AT2G23370	no
1921	GLDH	L-galactono-1:4-lactone dehydrogenase	823948	AT3G47930	no
1922	NRPE5	Eukaryotic rpb5 RNA polymerase subunit family protein	824875	AT3G57080	no
1923	AHL20	AT-hook motif nuclear-localized protein 20	827093	AT4G14465	no
1924	EXLB1	expansin-like B1	827411	AT4G17030	no
1925	AT5G38360	alpha/beta-Hydrolases superfamily protein	833818	AT5G38360	no
1926	AT1G78820	D-mannose binding lectin protein with Apple-like carbohydrate-binding domain-containing protein	844219	AT1G78820	no
1927	AT3G04450	Homeodomain-like superfamily protein	819601	AT3G04450	no
1928	PEX12	peroxin-12	819602	AT3G04460	peroxisomes
1929	HAT9	Homeobox-leucine zipper protein family	816811	AT2G22800	no
1930	AT1G06980	6:7-dimethyl-8-ribityllumazine synthase	837208	AT1G06980	no
1931	ATK3	kinesin 3	835556	AT5G54670	no
1932	HHP5	heptahelical protein 5	829989	AT4G38320	no
1933	AT1G76720	eukaryotic translation initiation factor 2 (eIF-2) family protein	844006	AT1G76720	no
1934	AT1G24095	Putative thiol-disulfide oxidoreductase DCC	10723023	AT1G24095	no
1935	LACS8	AMP-dependent synthetase and ligase family protein	814974	AT2G04350	no
1936	TCP14	TEOSINTE BRANCHED: cycloidea and PCF (TCP) 14	823916	AT3G47620	no
1937	PDS1	4-hydroxyphenylpyruvate dioxygenase	837168	AT1G06570	no
1938	RAP2.10	related to AP2 10	829843	AT4G36900	no
1939	AT2G30720	Thioesterase/thiol ester dehydrase-isomerase superfamily protein	817623	AT2G30720	no
1940	AT1G11160	Transducin/WD40 repeat-like superfamily protein	837657	AT1G11160	no
1941	TUF	vacuolar ATP synthase subunit E1	826716	AT4G11150	no
1942	AT4G16450	NADH-ubiquinone oxidoreductase	827343	AT4G16450	no
1943	SAR1B	secretion-associated RAS 1B	842086	AT1G56330	no
1944	AT3G49880	glycosyl hydrolase family protein 43	824150	AT3G49880	no
1945	BGLU24	beta glucosidase 24	832944	AT5G28510	no
1946	OFP16	ovate family protein 16	817770	AT2G32100	no
1947	HEXO3	beta-hexosaminidase 3	842871	AT1G65590	no
1948	AHG1	Protein phosphatase 2C family protein	835250	AT5G51760	no
1949	GGH3	gamma-glutamyl hydrolase 3	844203	AT1G78670	no
1950	AT2G46550	transmembrane protein	819267	AT2G46550	no
1951	AT5G42500	Disease resistance-responsive (dirigent-like protein) family protein	834257	AT5G42500	no
1952	TET5	tetraspanin5	828440	AT4G23410	no
1953	AT5G16940	carbon-sulfur lyase	831557	AT5G16940	no
1954	RLP38	receptor like protein 38	821887	AT3G23120	no
1955	CH1	Pheophorbide a oxygenase family protein with Rieske 2Fe-2S domain-containing protein	841029	AT1G44446	no
1956	HESO1	Nucleotidyltransferase family protein	818559	AT2G39740	no
1957	AT1G34040	Pyridoxal phosphate (PLP)-dependent transferases superfamily protein	840301	AT1G34040	no
1958	AT5G07710	Polynucleotidyl transferase: ribonuclease H-like superfamily protein	830664	AT5G07710	no
1959	APRR8	pseudo-response regulator 8	828011	AT4G00760	no
1960	AT3G55020	Ypt/Rab-GAP domain of gyp1p superfamily protein	824668	AT3G55020	no
1961	AT4G29480	Mitochondrial ATP synthase subunit G protein	829069	AT4G29480	no
1962	emb1273	embryo defective 1273	841375	AT1G49510	no
1963	AT1G50670	OTU-like cysteine protease family protein	841489	AT1G50670	no
1964	RUG1	Regulator of chromosome condensation (RCC1) family protein	830771	AT5G08710	no
1965	GSO2	Leucine-rich repeat transmembrane protein kinase	834499	AT5G44700	no
1966	Tic32-IVa	NAD(P)-binding Rossmann-fold superfamily protein	828442	AT4G23430	no
1967	CNGC3	cyclic nucleotide gated channel 3	819251	AT2G46430	no
1968	AT2G22420	Peroxidase superfamily protein	816773	AT2G22420	no
1969	DWA2	DWD (DDB1-binding WD40 protein) hypersensitive to ABA 2	843959	AT1G76260	no
1970	BRG1	SBP (S-ribonuclease binding protein) family protein	834543	AT5G45100	no
1971	AT4G29750	CRS1 / YhbY (CRM) domain-containing protein	829097	AT4G29750	no
1972	AT5G19120	Eukaryotic aspartyl protease family protein	832032	AT5G19120	no
1973	AT3G24840	Sec14p-like phosphatidylinositol transfer family protein	822082	AT3G24840	no
1974	AT3G43960	Cysteine proteinases superfamily protein	823513	AT3G43960	no
1975	AT1G54450	Calcium-binding EF-hand family protein	841887	AT1G54450	no
1976	AT1G65070	DNA mismatch repair protein MutS: type 2	842815	AT1G65070	no
1977	AT2G47780	Rubber elongation factor protein (REF)	819390	AT2G47780	no
1978	AT1G29600	Zinc finger C-x8-C-x5-C-x3-H type family protein	839837	AT1G29600	no
1979	AT1G30260	galactosyltransferase family protein	839906	AT1G30260	no
1980	PME3	pectin methylesterase 3	820651	AT3G14310	no
1981	AT5G49665	Zinc finger (C3HC4-type RING finger) family protein	835029	AT5G49665	no
1982	AT3G44740	Class II aaRS and biotin synthetases superfamily protein	823604	AT3G44740	no
1983	PD1	prephenate dehydratase 1	817329	AT2G27820	no
1984	AT2G30270	LURP-one-like protein (DUF567)	817577	AT2G30270	no
1985	AT1G15885	hypothetical protein	5007698	AT1G15885	no
1986	FMO GS-OX1	flavin-monooxygenase glucosinolate S-oxygenase 1	842897	AT1G65860	no
1987	AT1G06010	basic leucine zipper/W2 domain protein	837110	AT1G06010	no
1988	AT5G20670	DUF1677 family protein (DUF1677)	832190	AT5G20670	no
1989	AT5G35930	AMP-dependent synthetase and ligase family protein	833582	AT5G35930	no
1990	AT5G38005		5008282	AT5G38005	no
1991	AT1G04527		28716138	AT1G04527	no
1992	LEA4-5	Late Embryogenesis Abundant 4-5	830565	AT5G06760	no
1993	AT3G17350	wall-associated receptor kinase carboxy-terminal protein	820998	AT3G17350	no
1994	OMT1	O-methyltransferase 1	835504	AT5G54160	no
1995	AT3G57070	Glutaredoxin family protein	824874	AT3G57070	no
1996	CYP81D11	Cytochrome P450 superfamily protein	822506	AT3G28740	no
1997	PQL3	PsbQ-like 3	3768499	AT2G01918	no
1998	TBL25	TRICHOME BIREFRINGENCE-LIKE 25	837247	AT1G01430	no
[truncated: 3 more rows]
